# Supplementary material
Source: PubMed Central journal article supplement (PMC3834962)

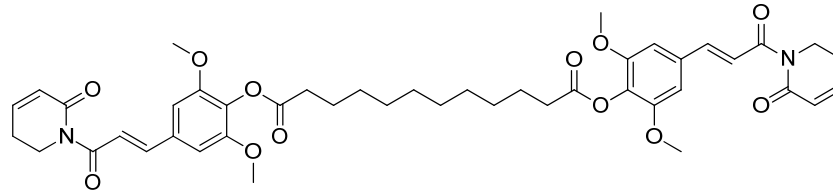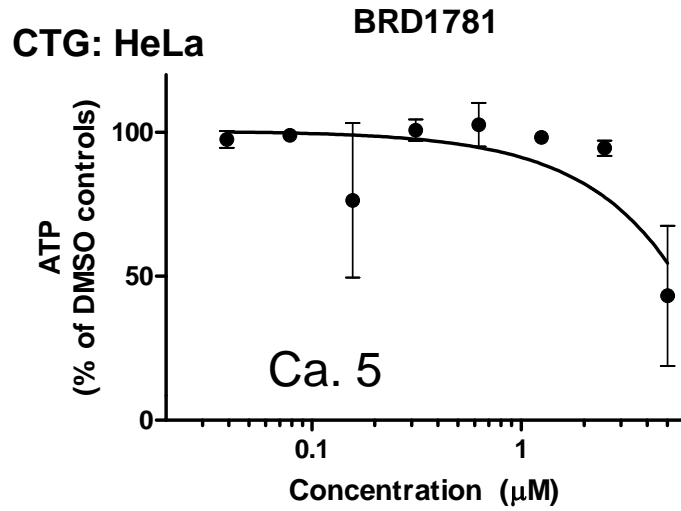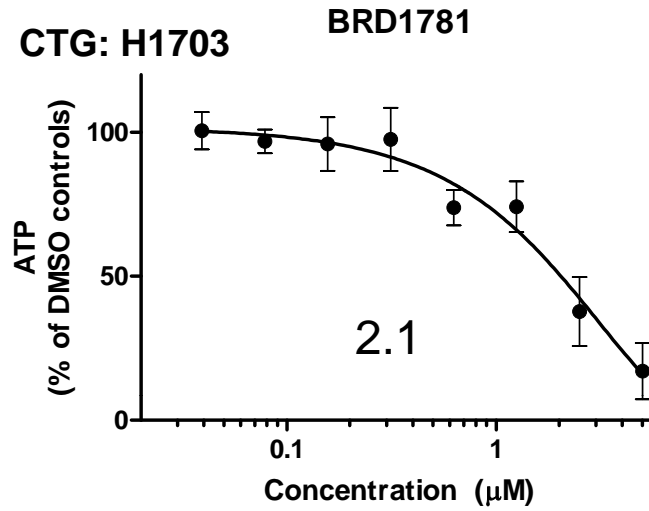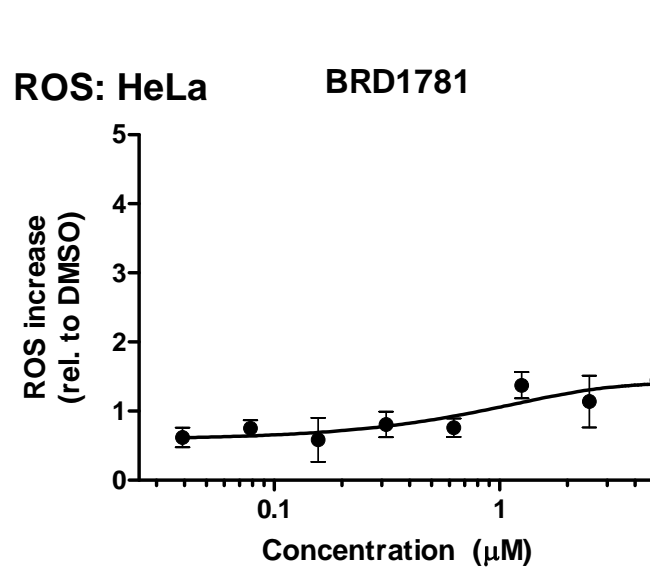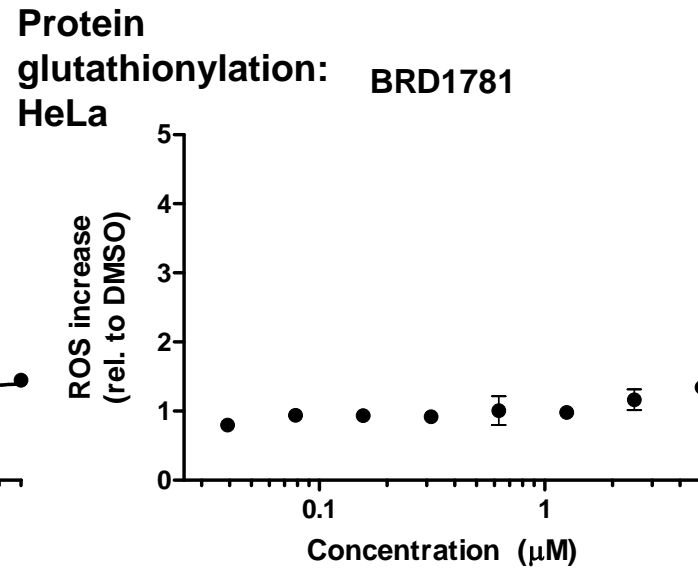

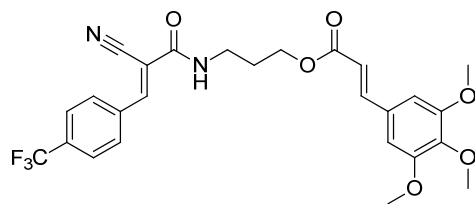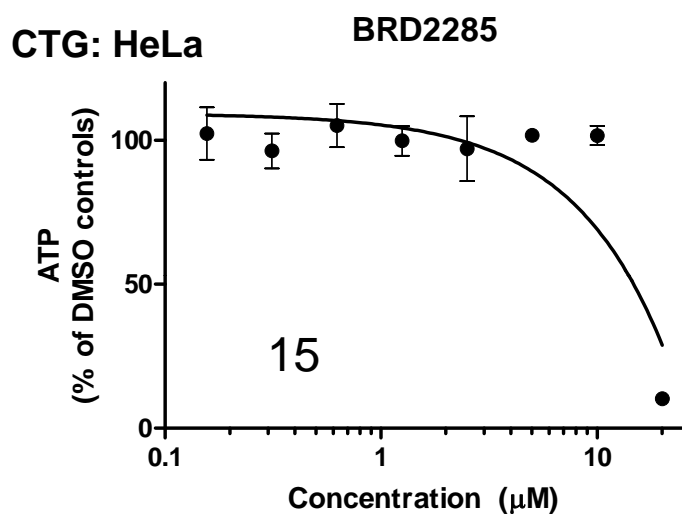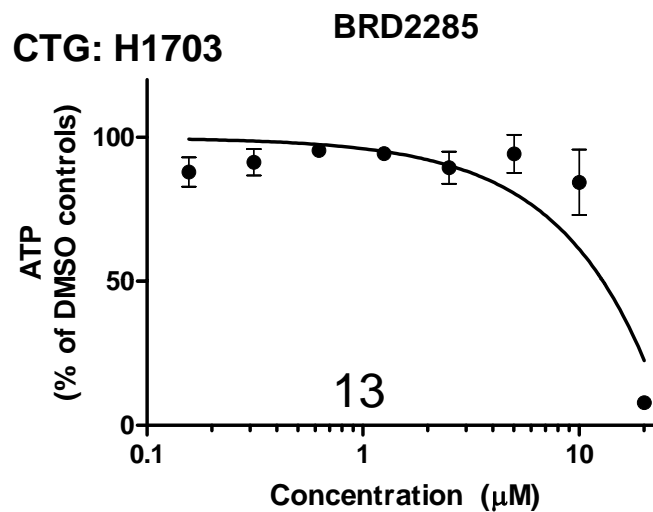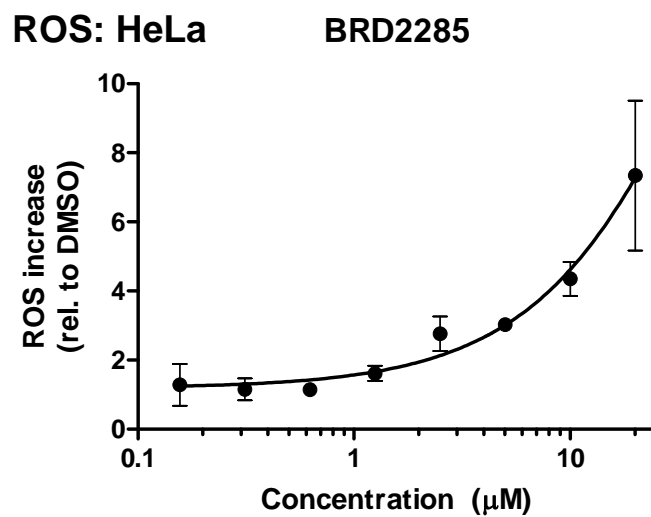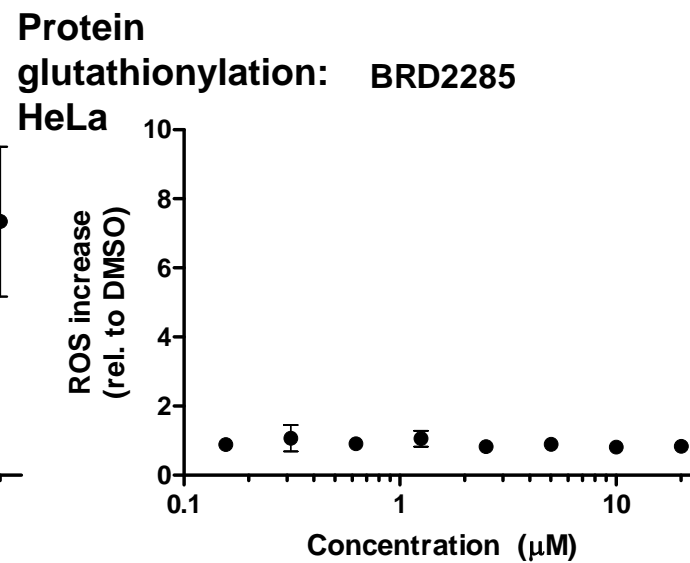

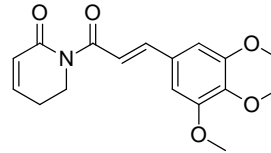

Piperlongumine

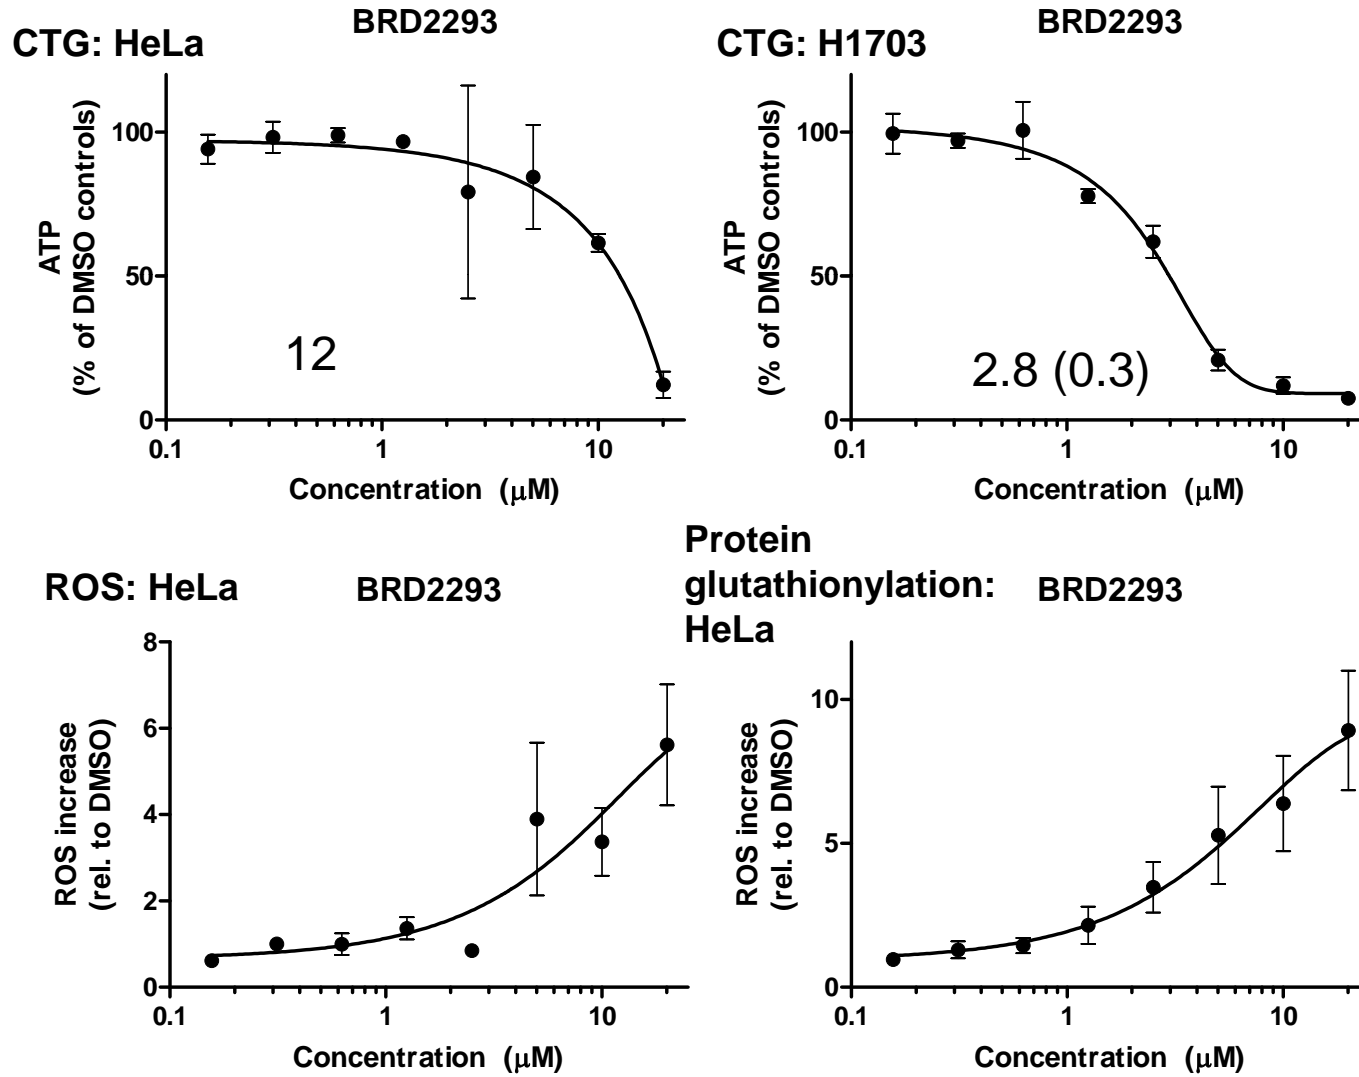

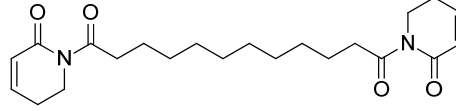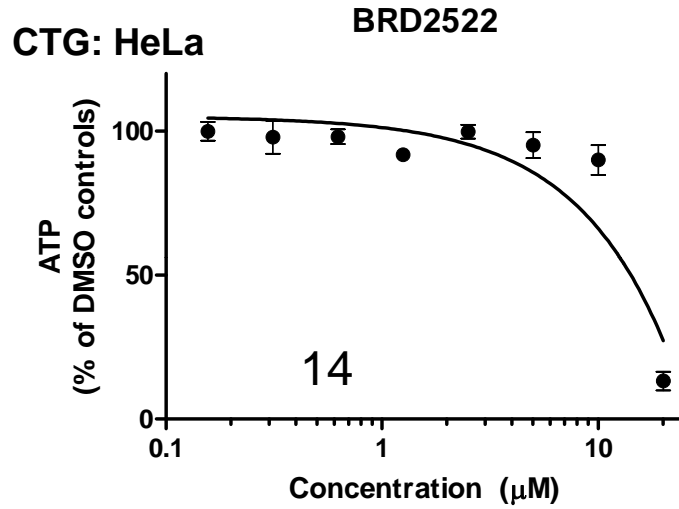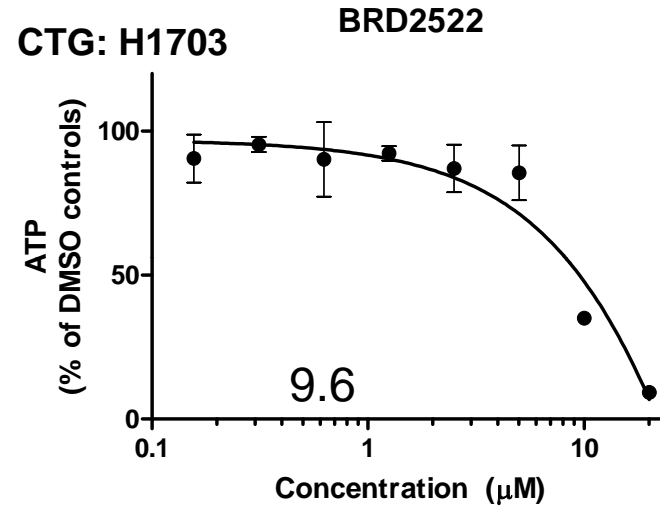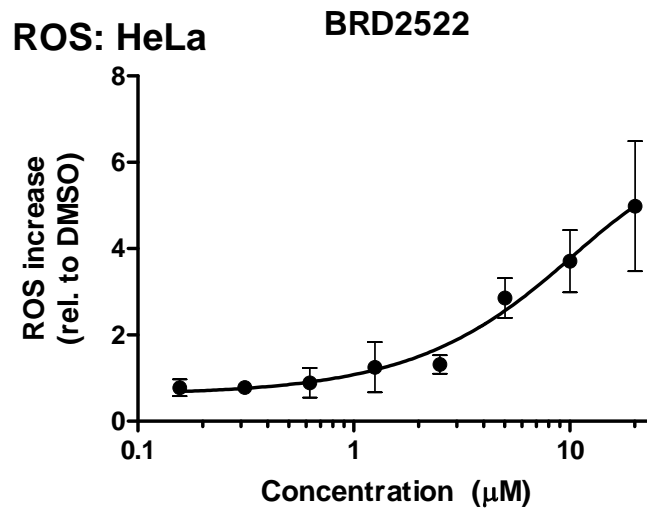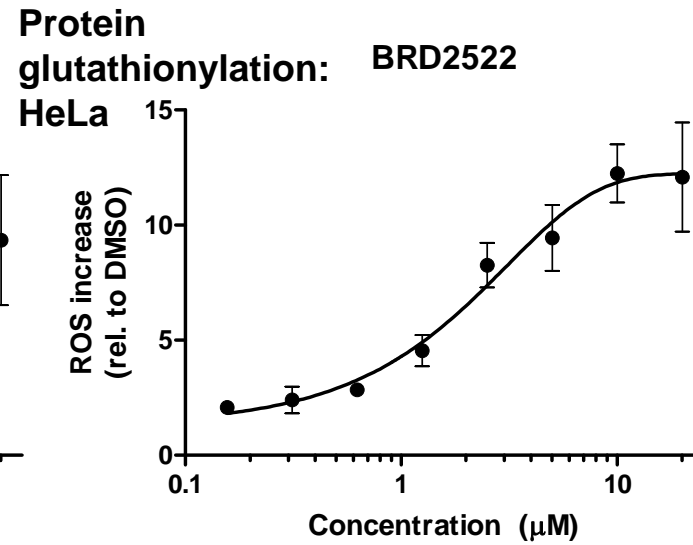

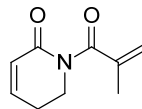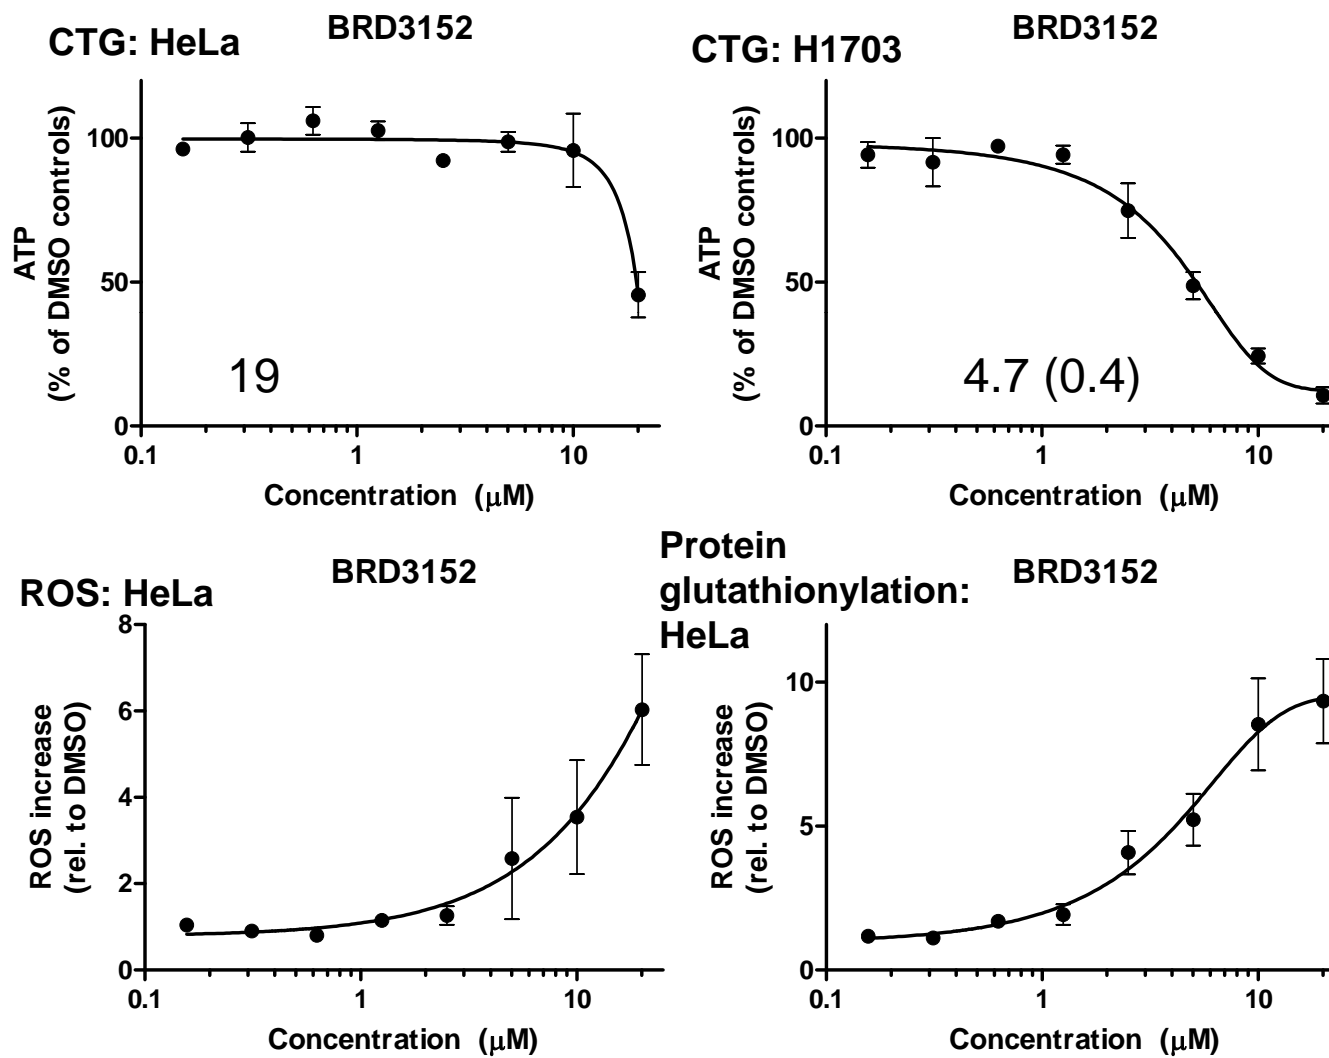

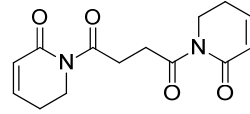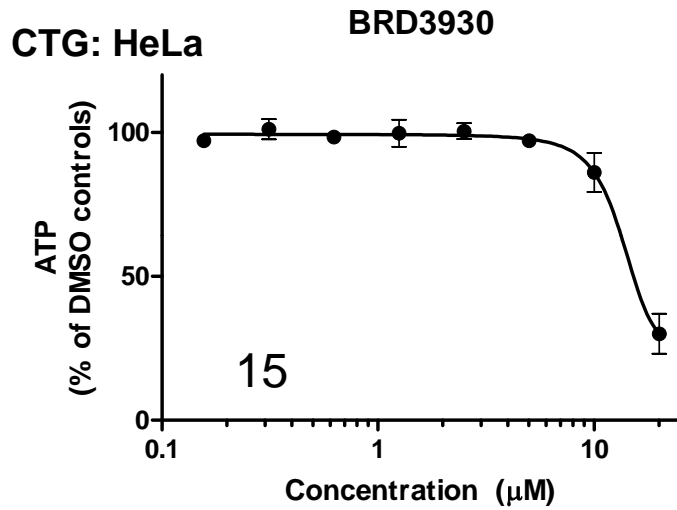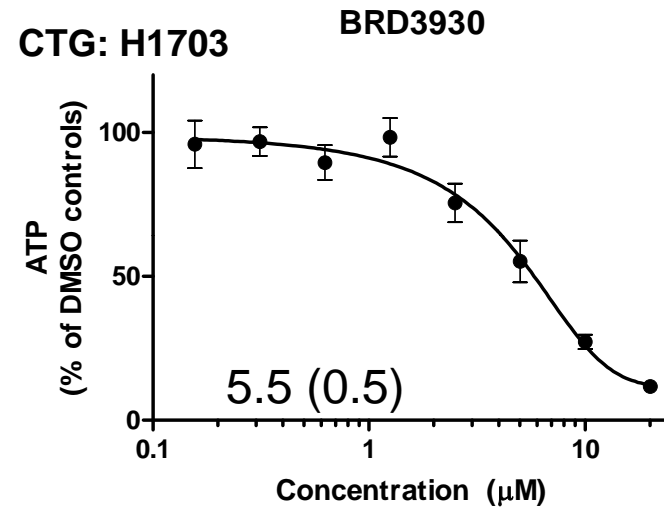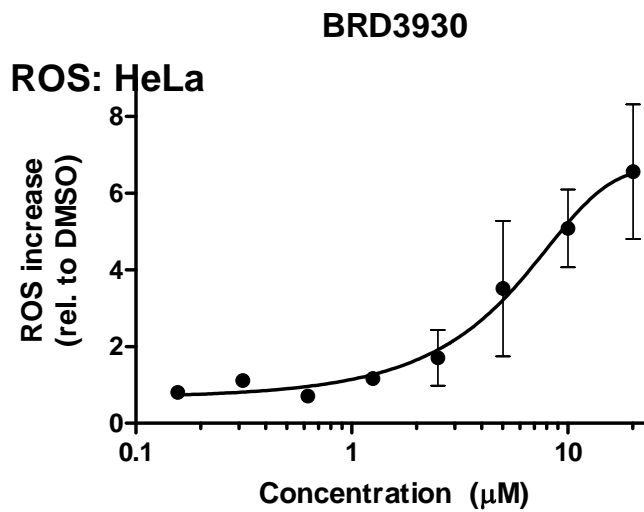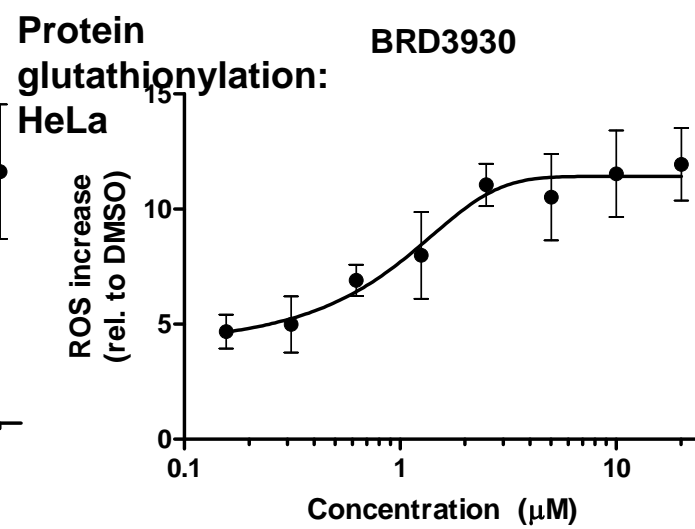

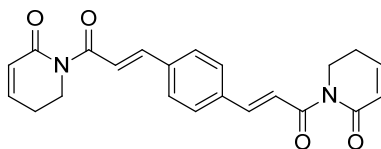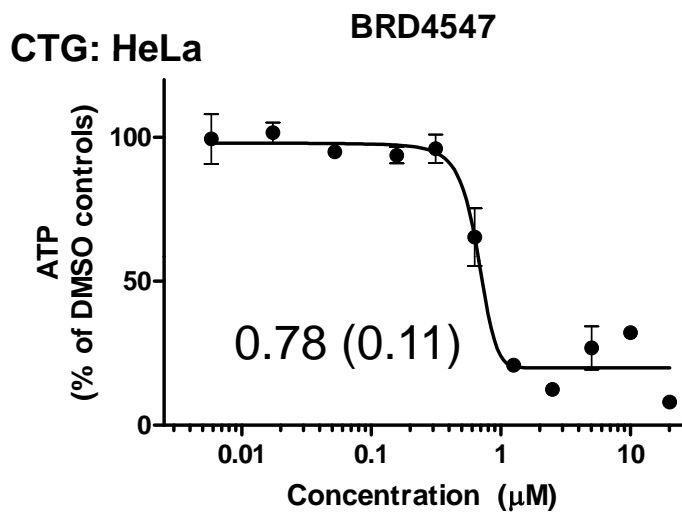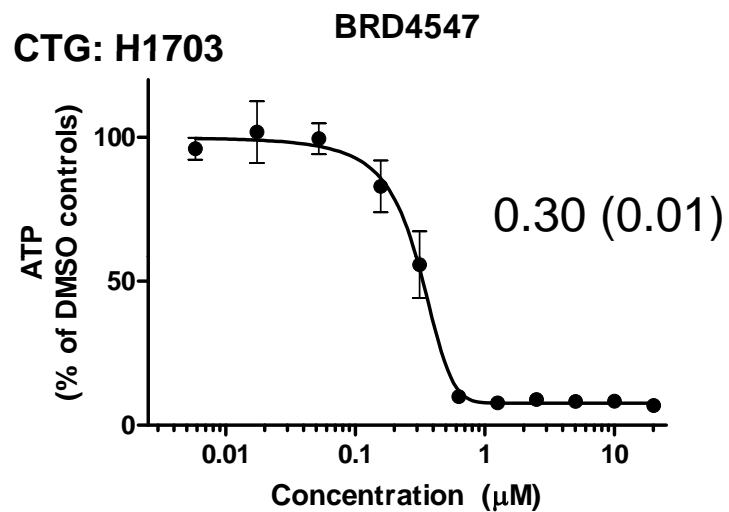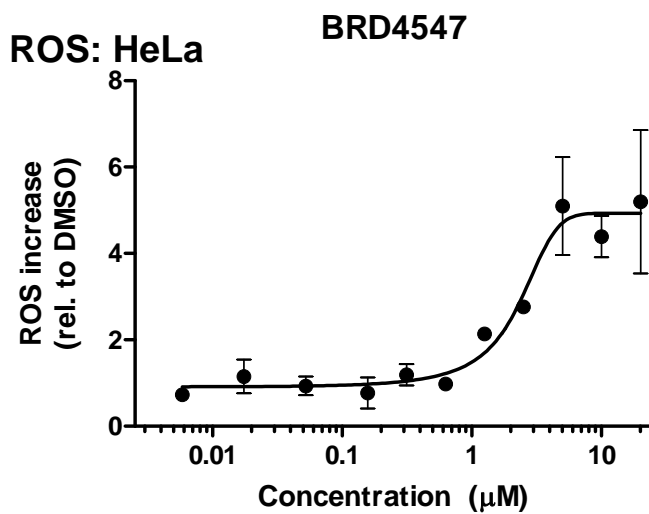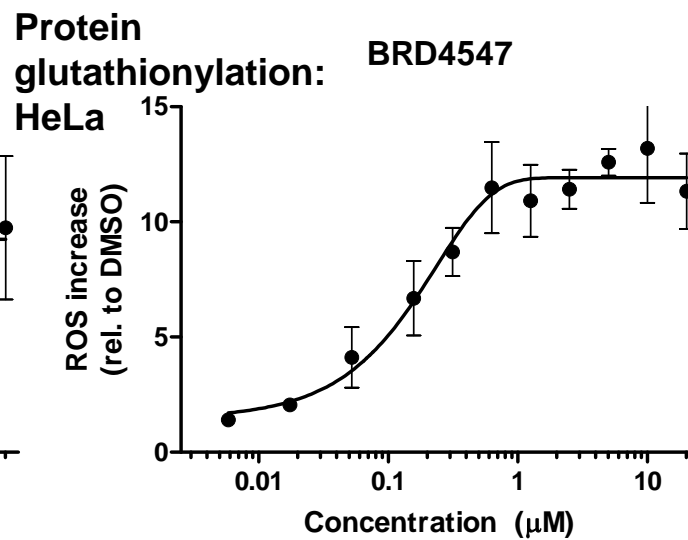

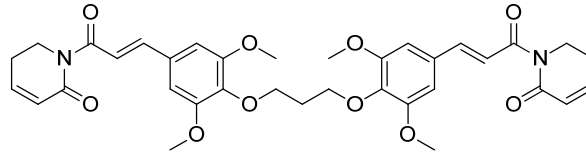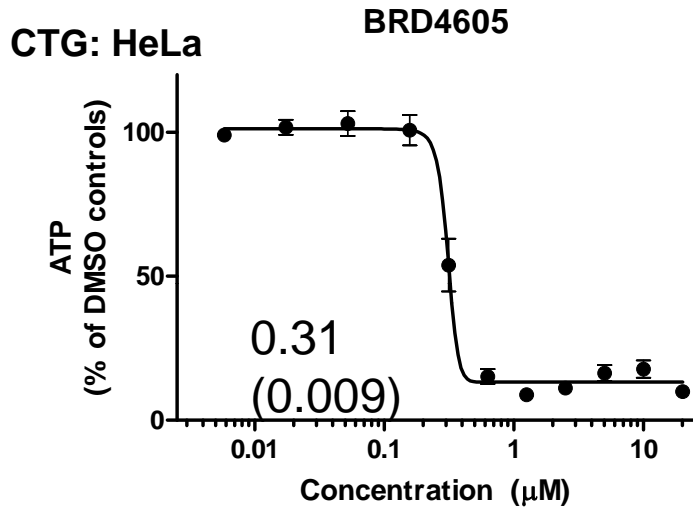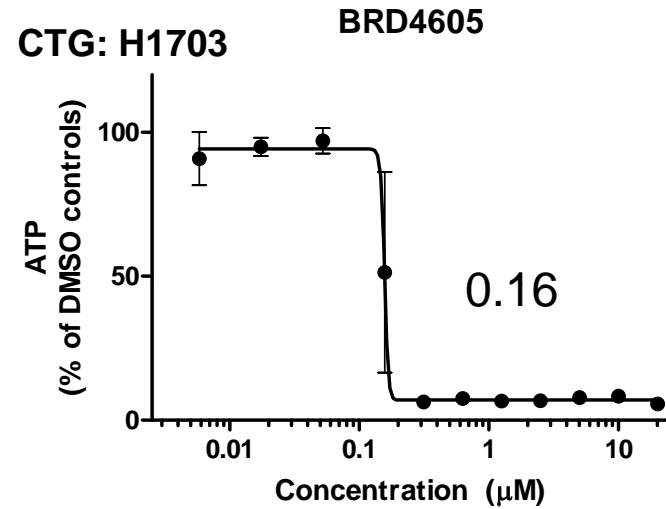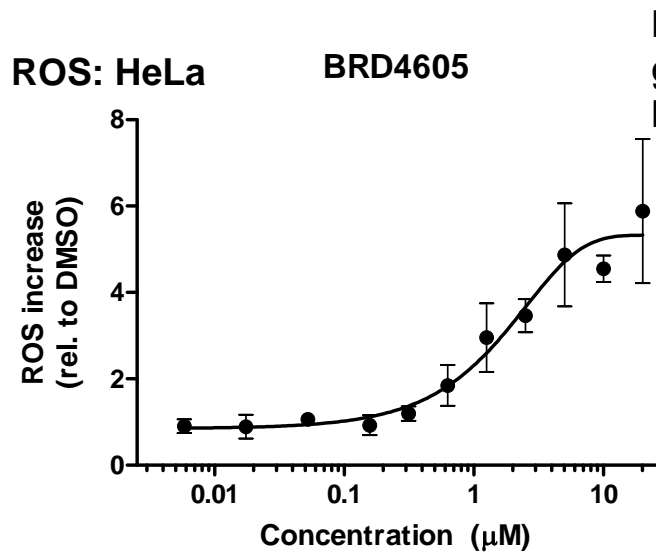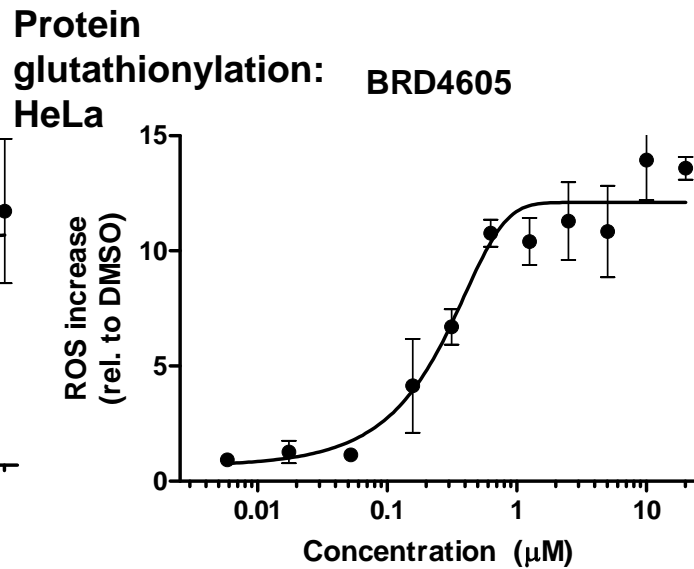



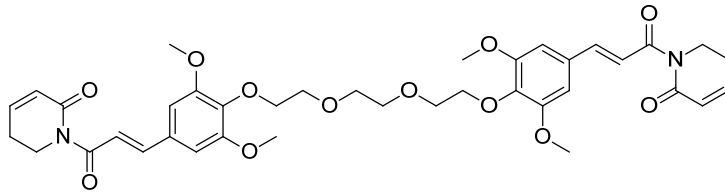

**BRD4691**

**CTG: HeLa**

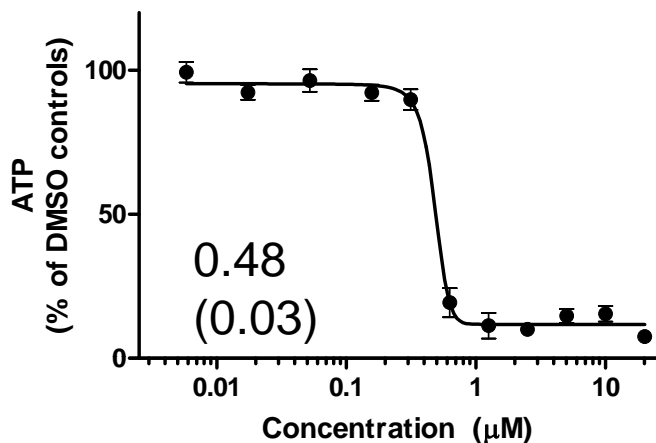

**CTG: H1703**

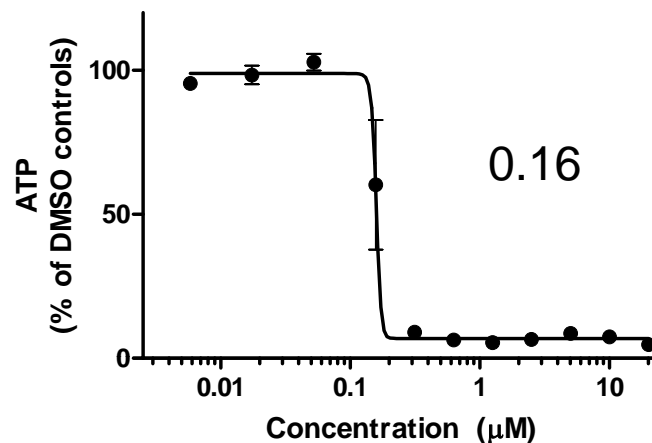

**ROS: HeLa**

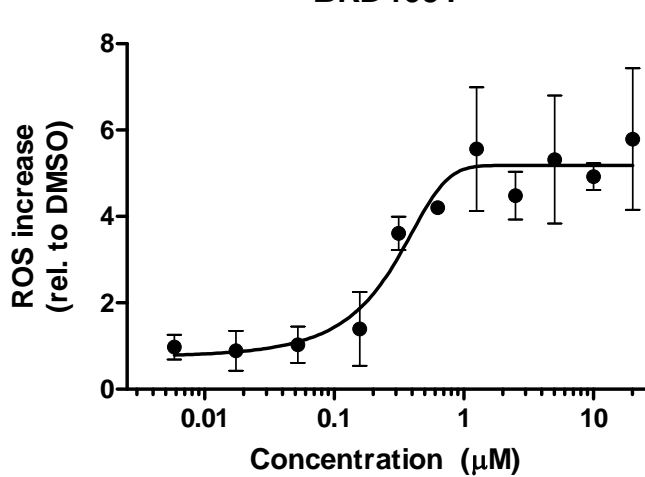

**Protein glutathionylation: HeLa**

**BRD4691**

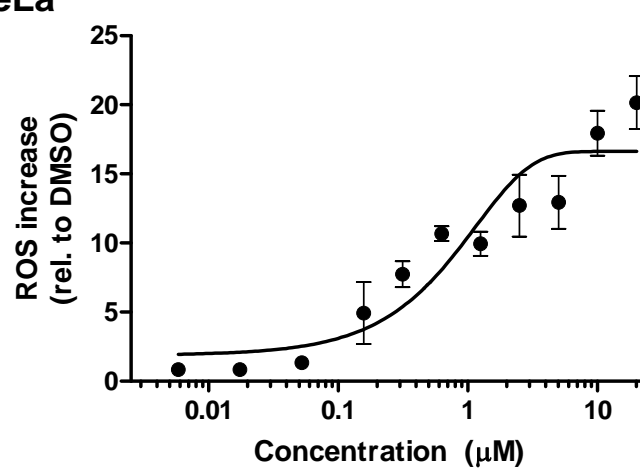

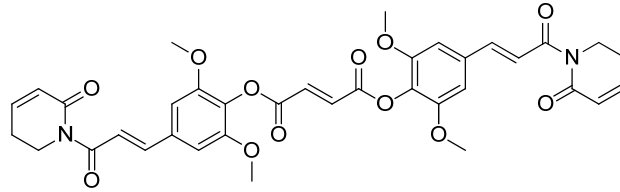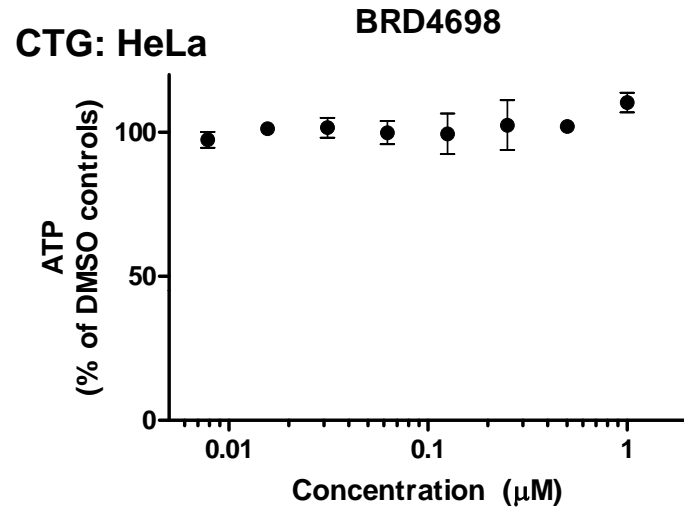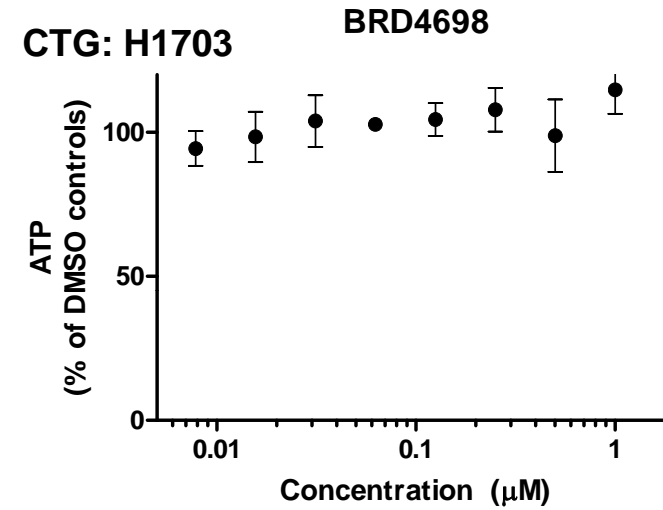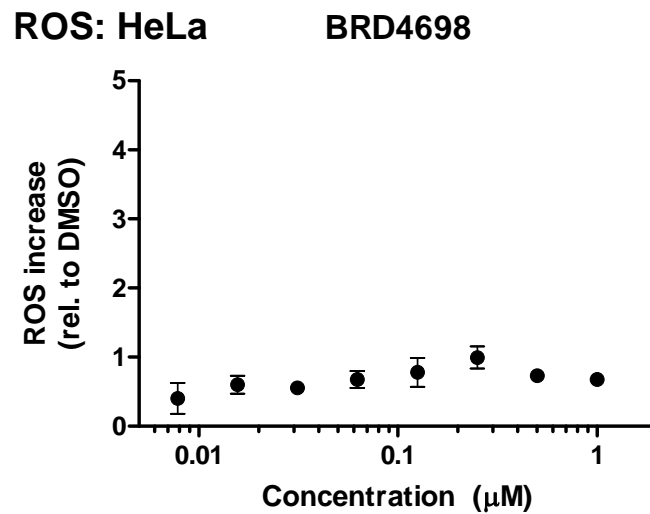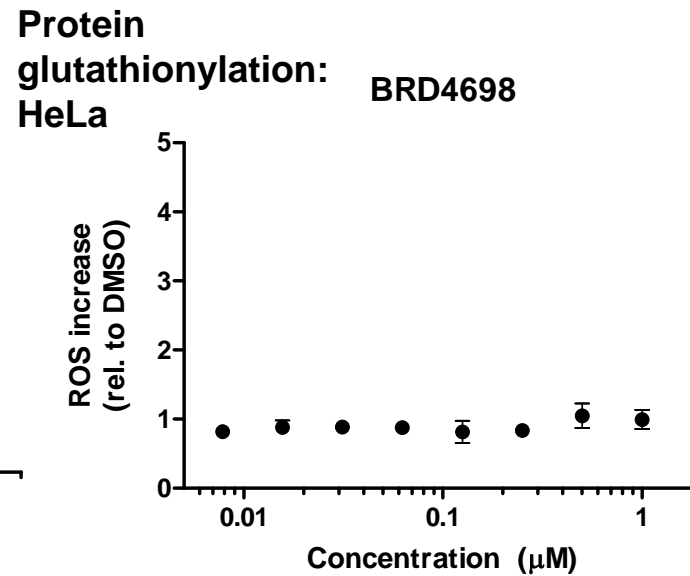

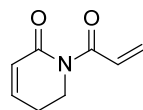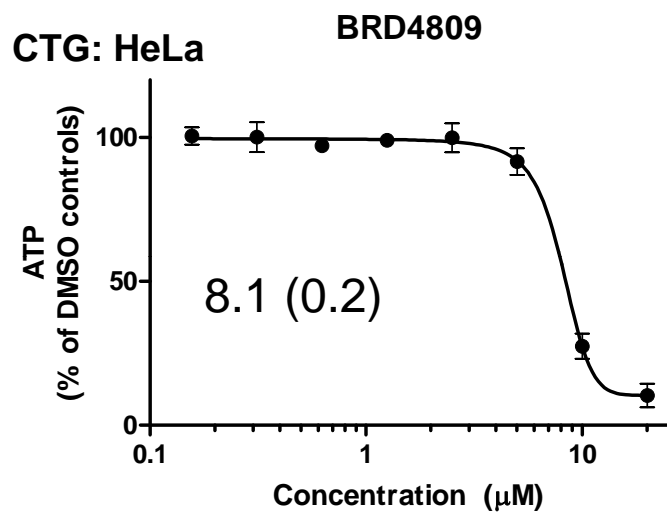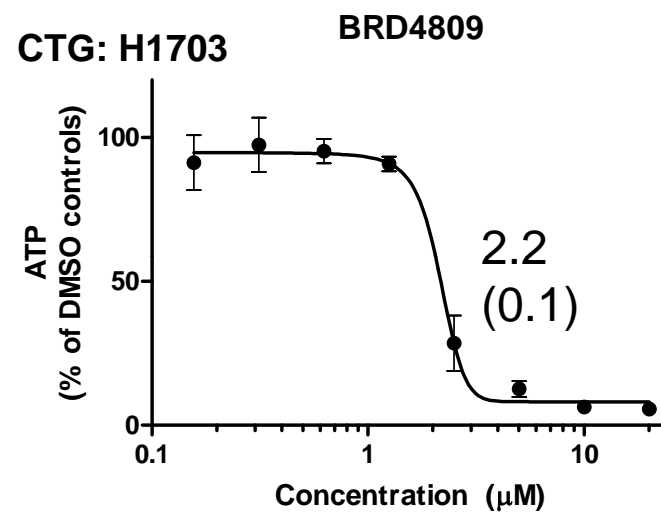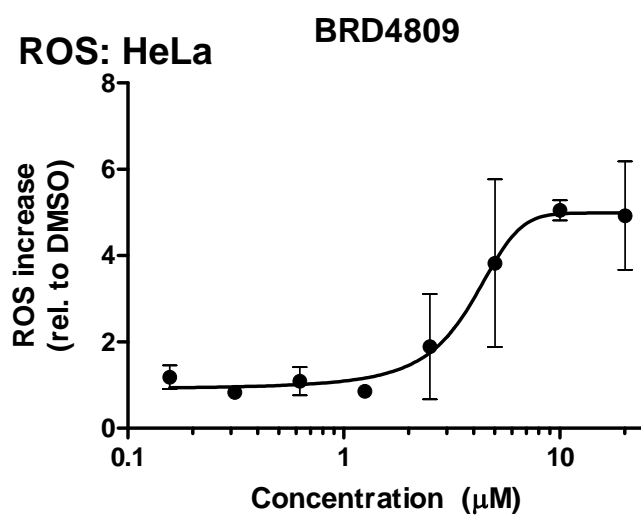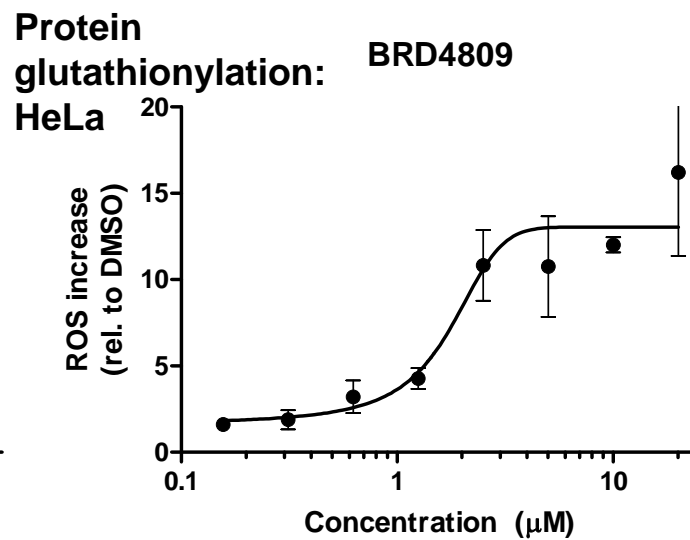

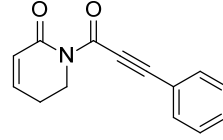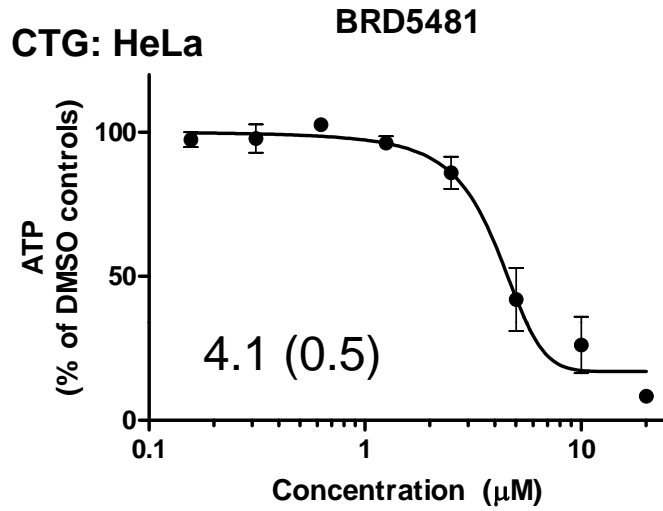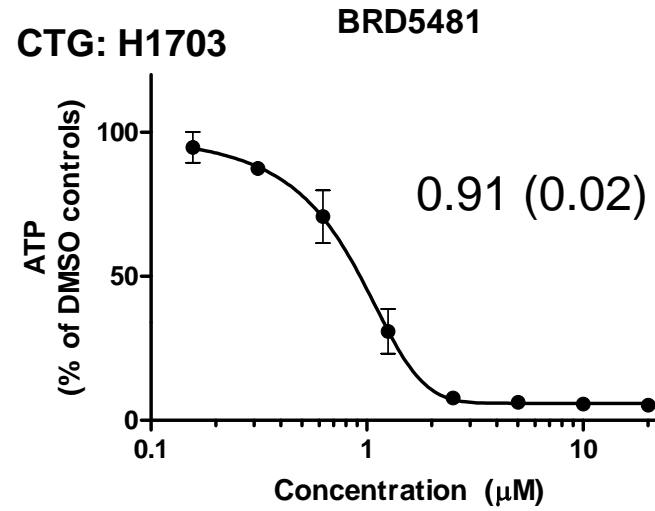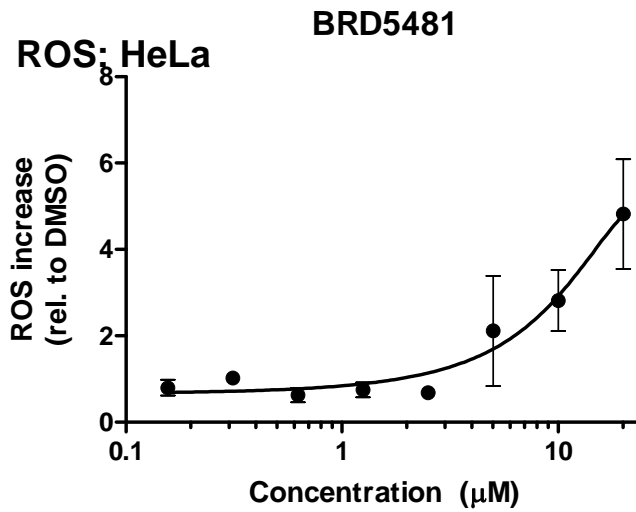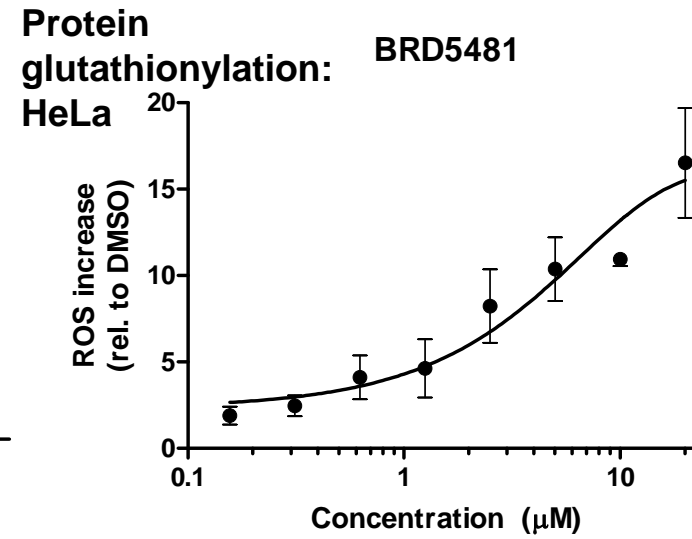

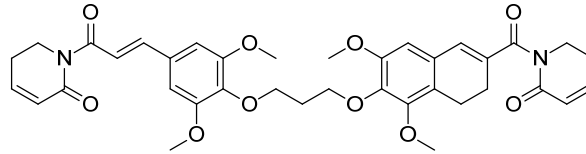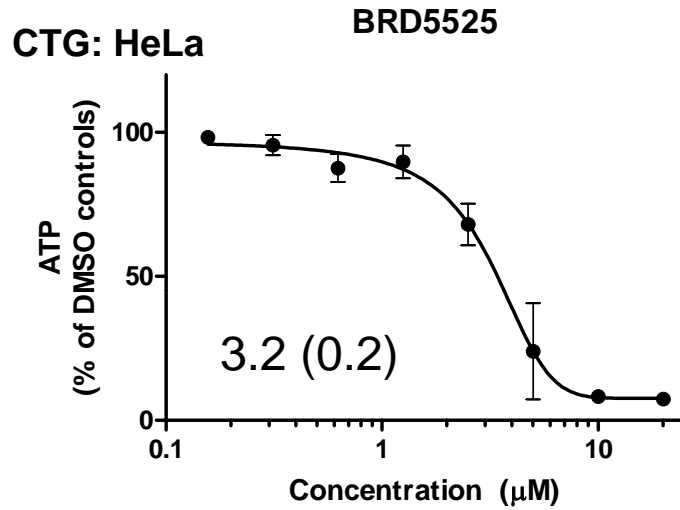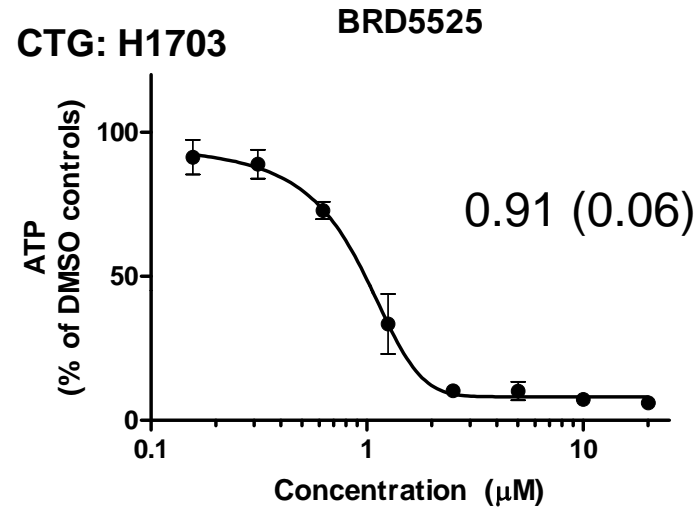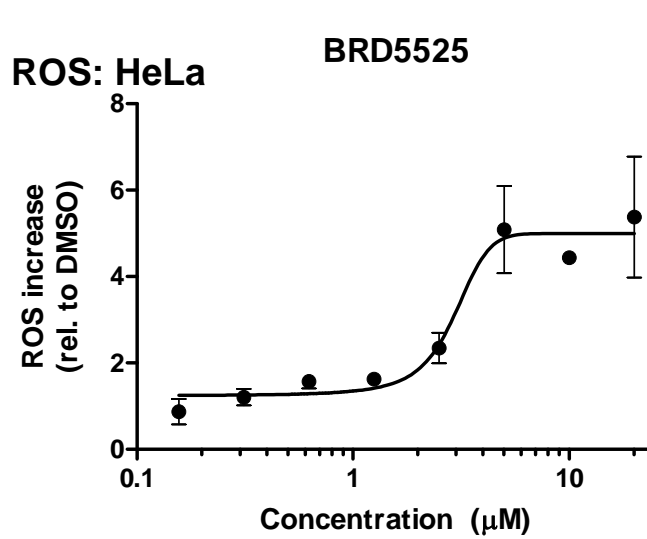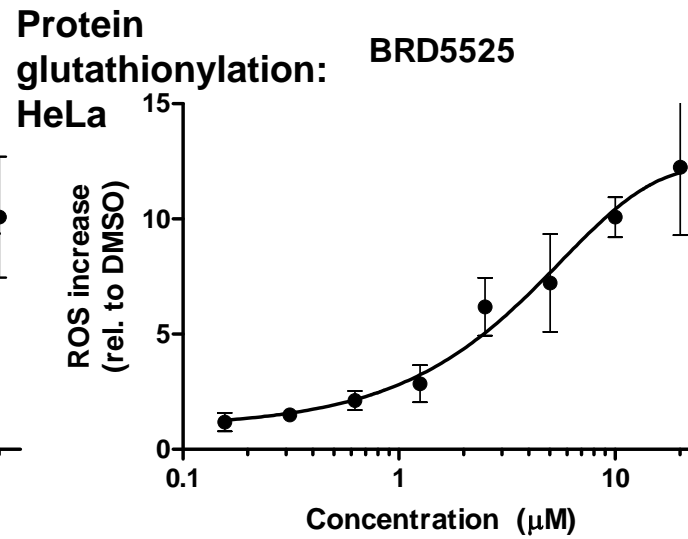

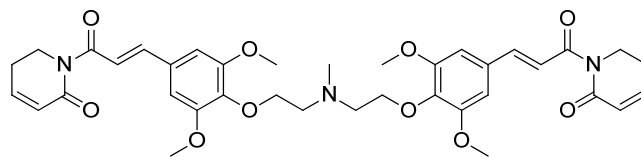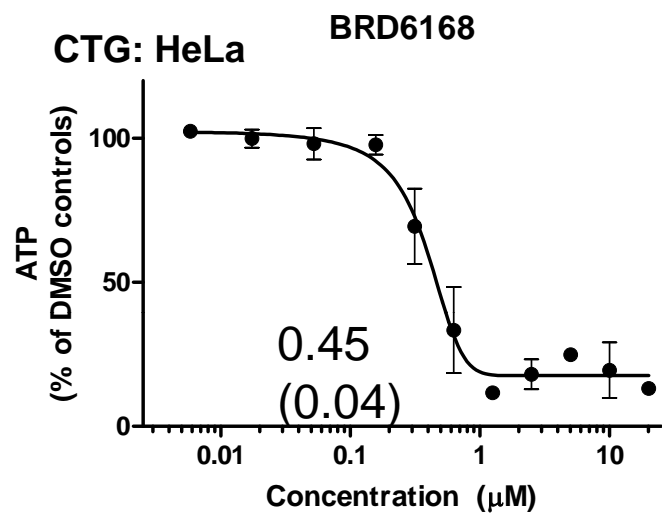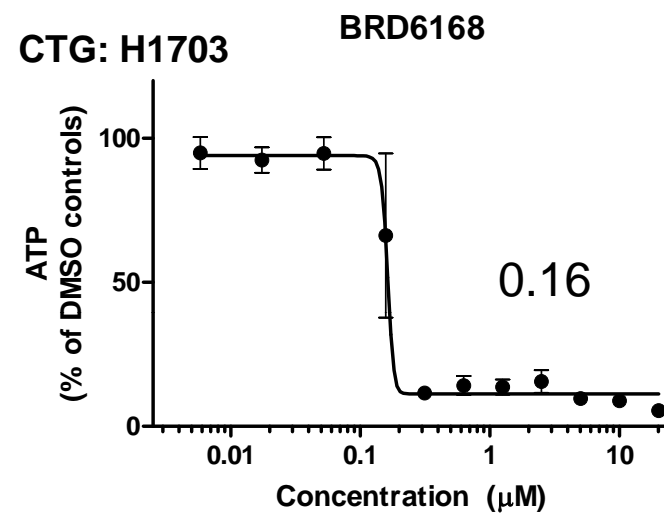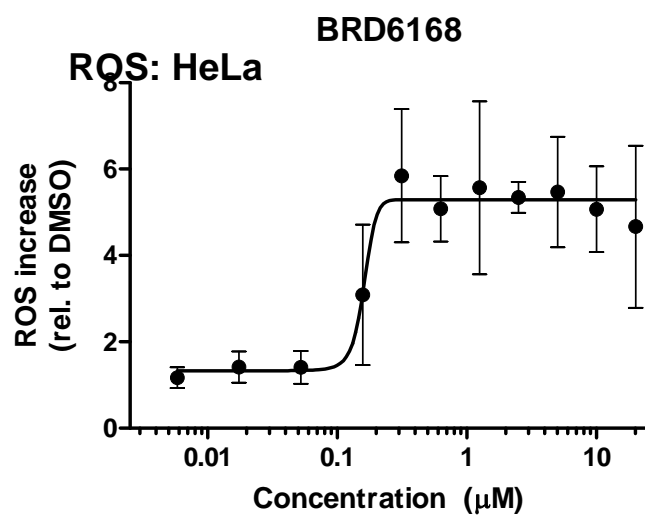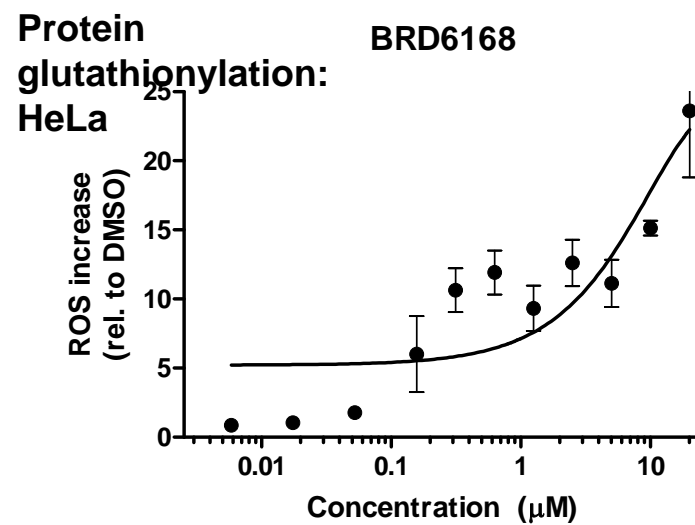

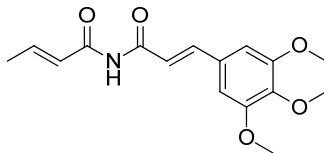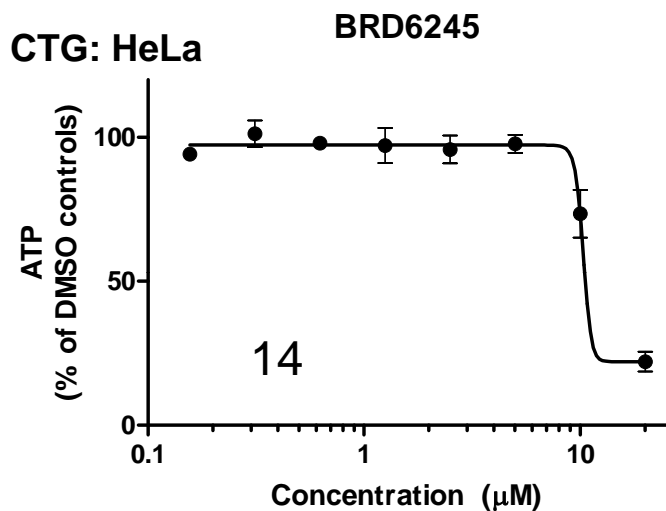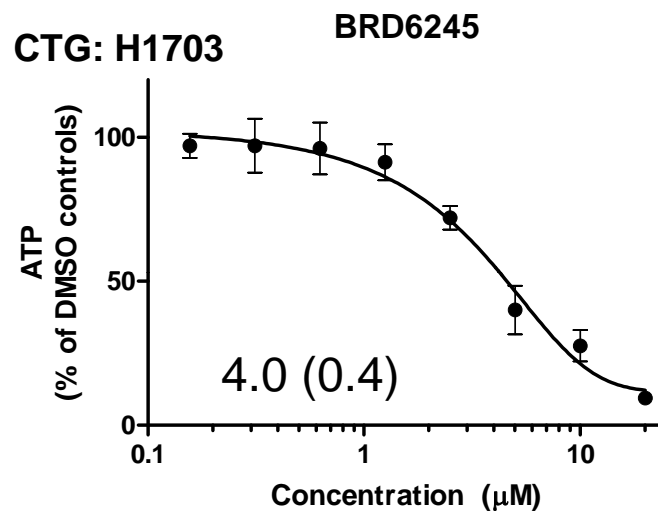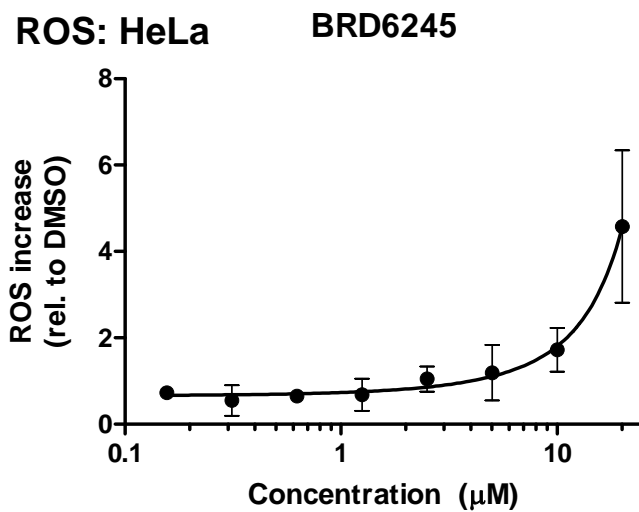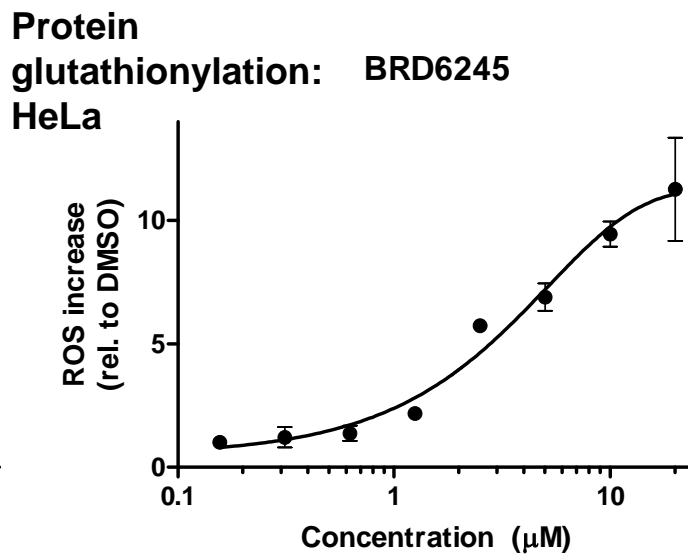

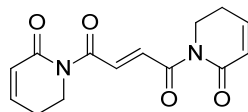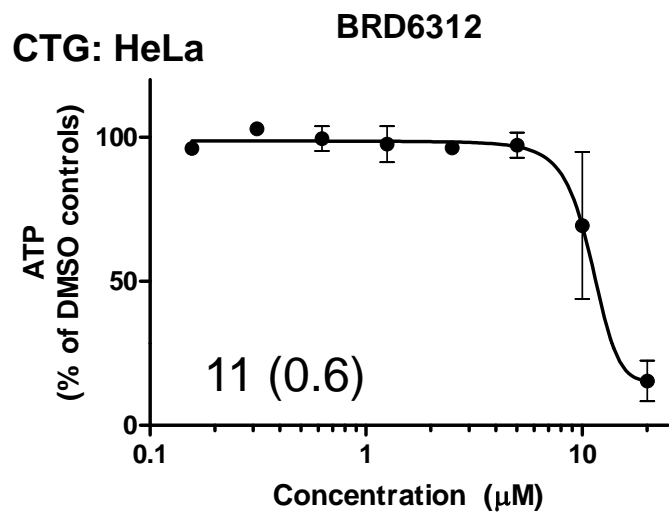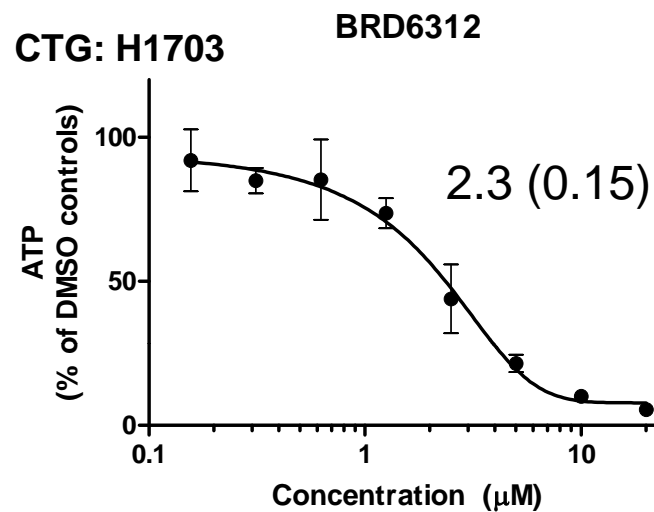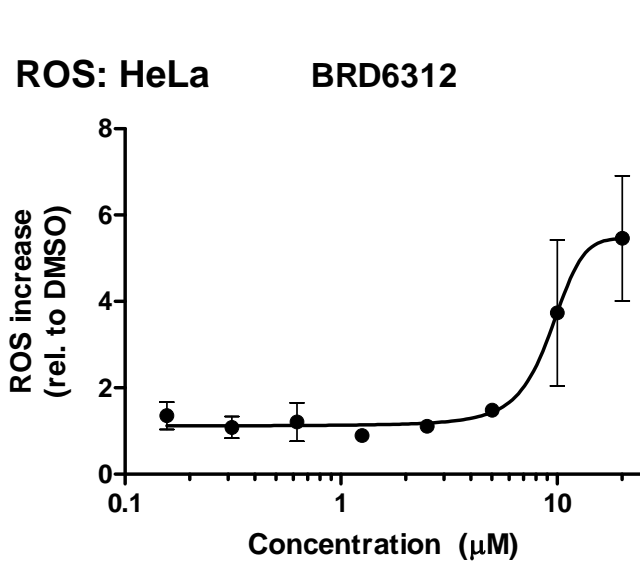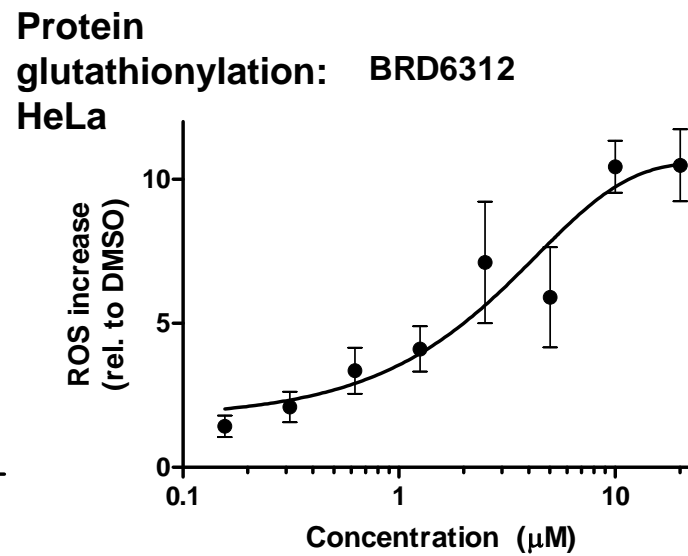



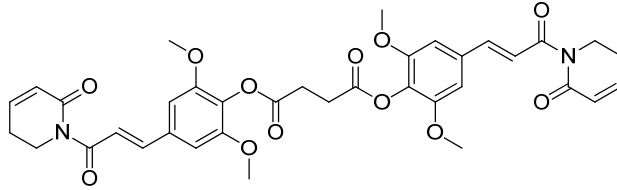

CTG: HeLa

BRD6335

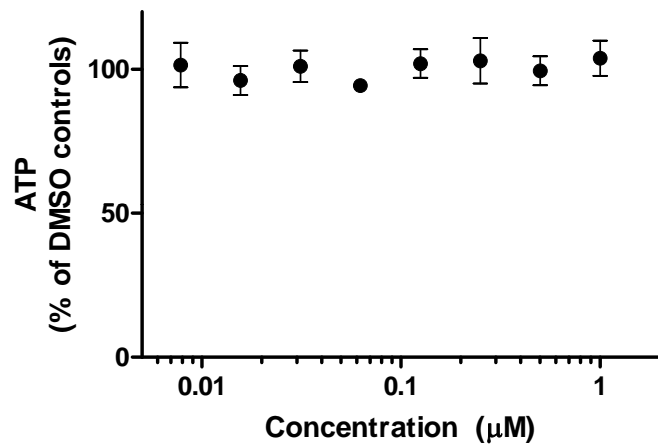

CTG: H1703

BRD6335

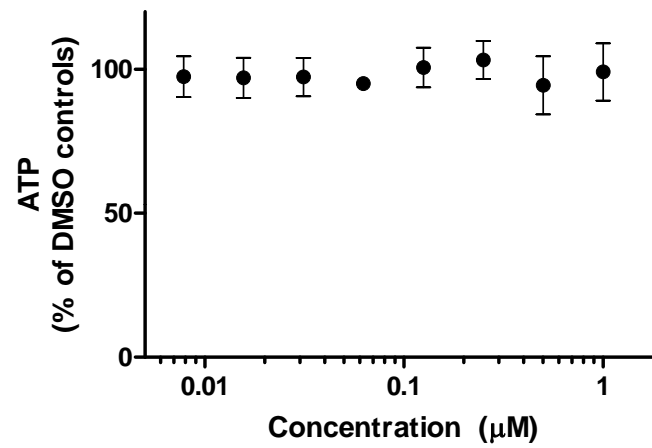

ROS: HeLa

BRD6335

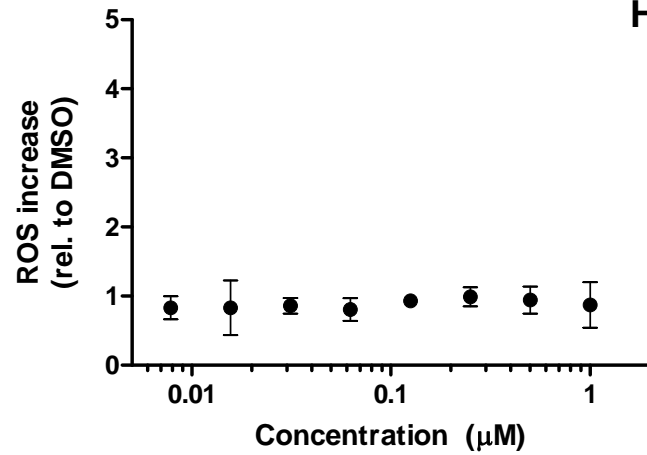

Protein

glutathionylation: BRD6335

HeLa

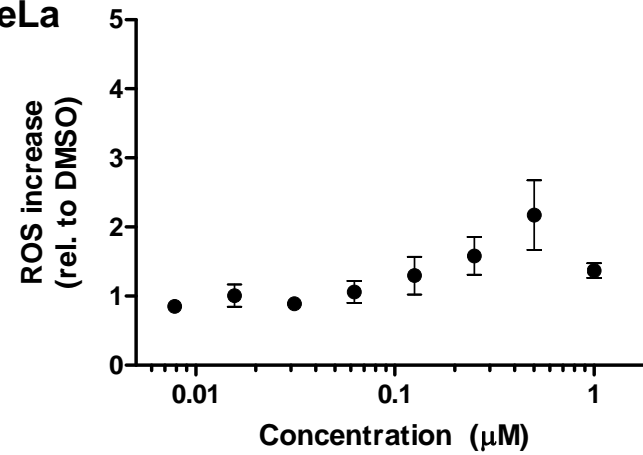

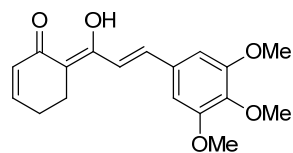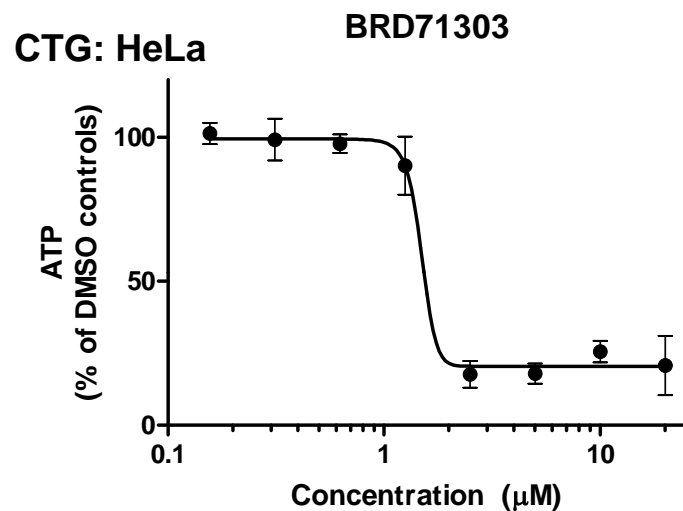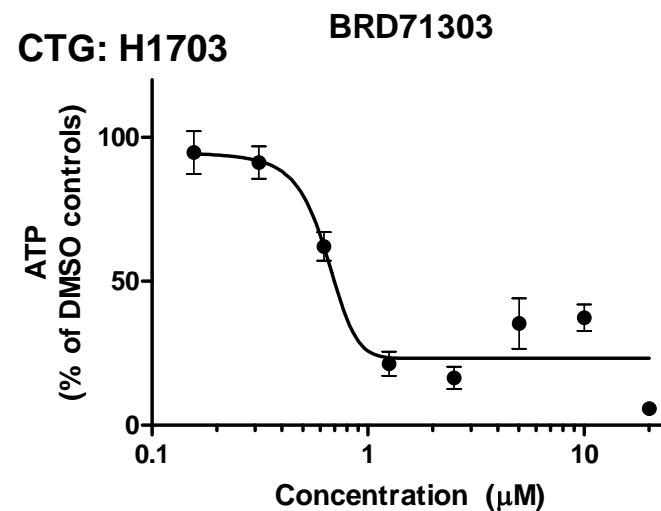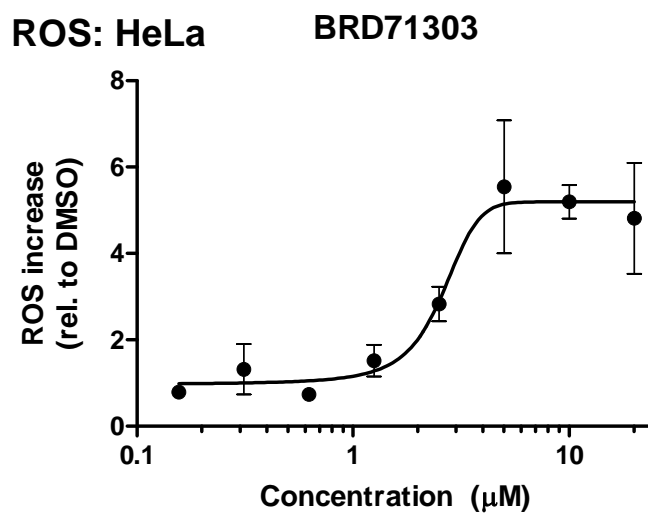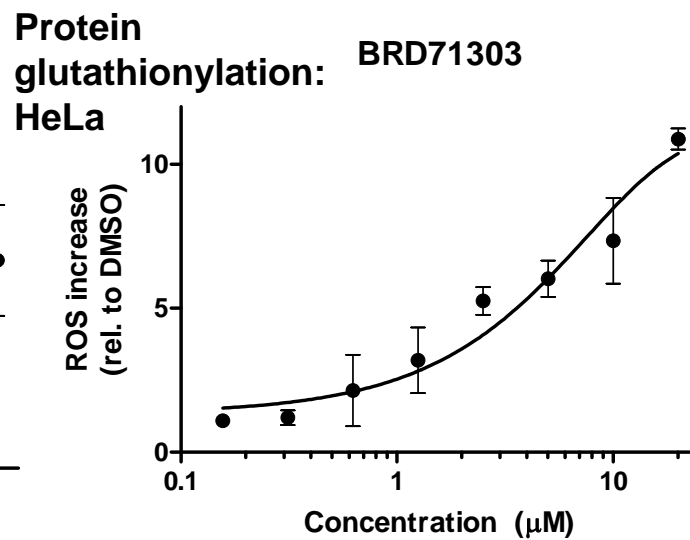

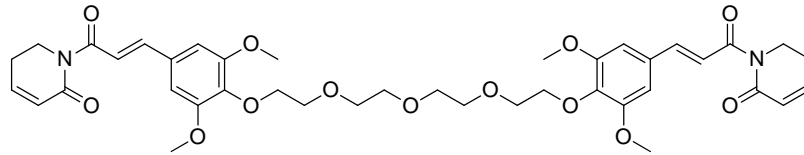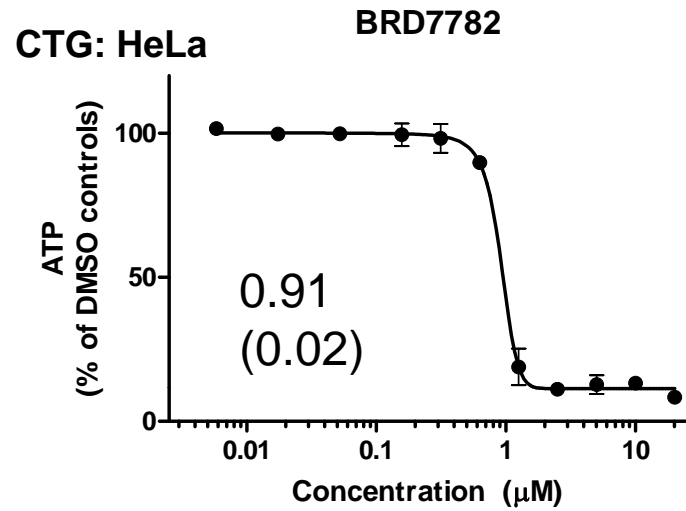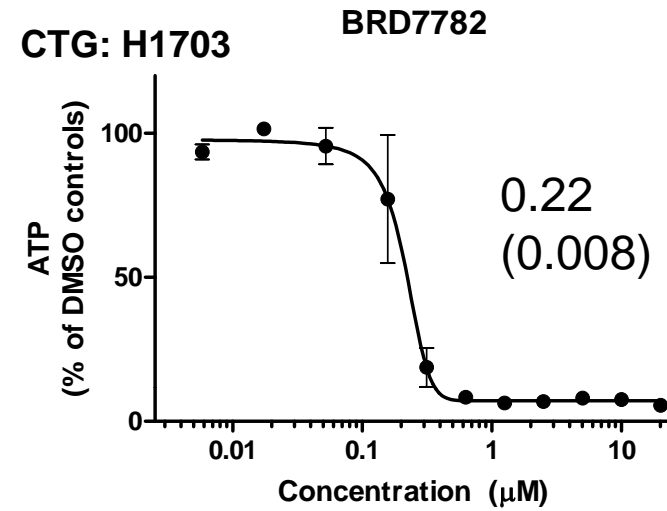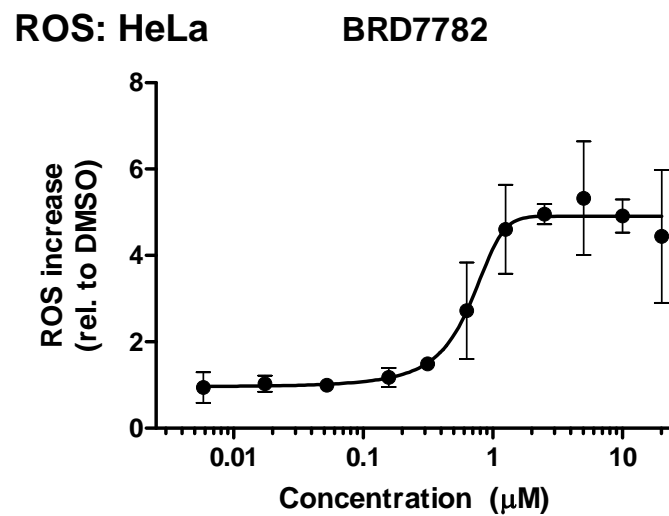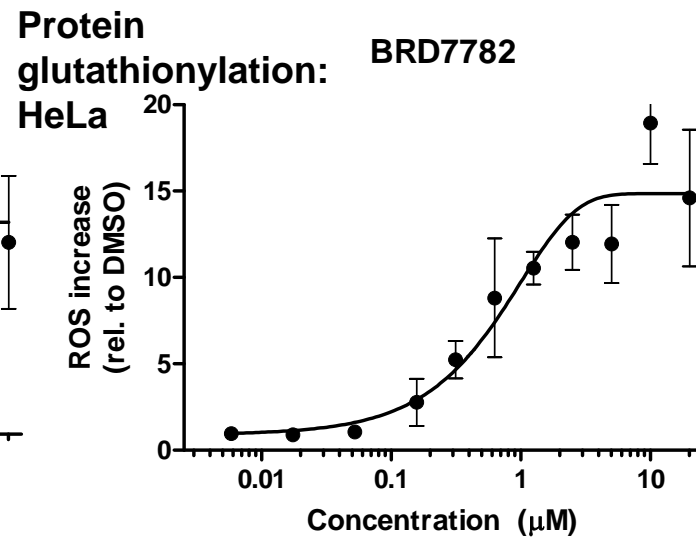

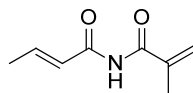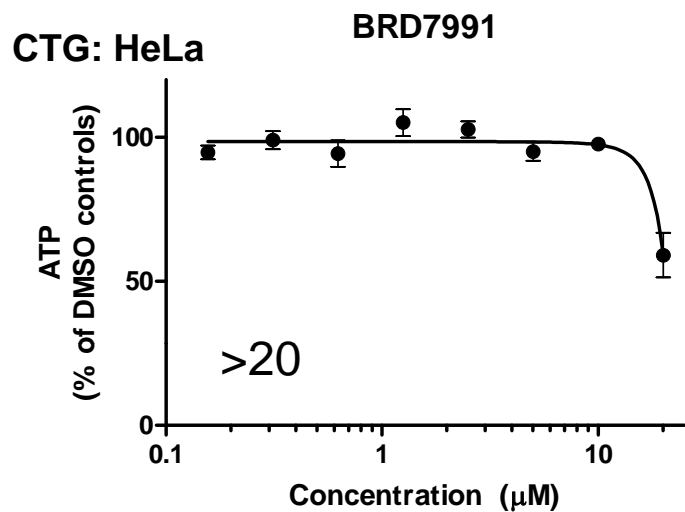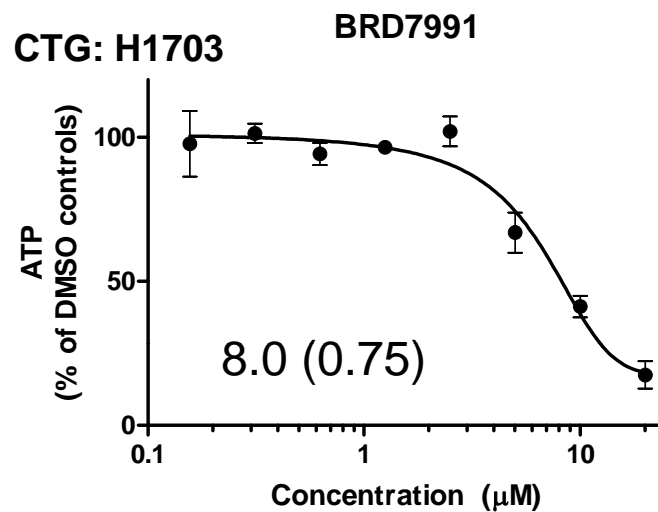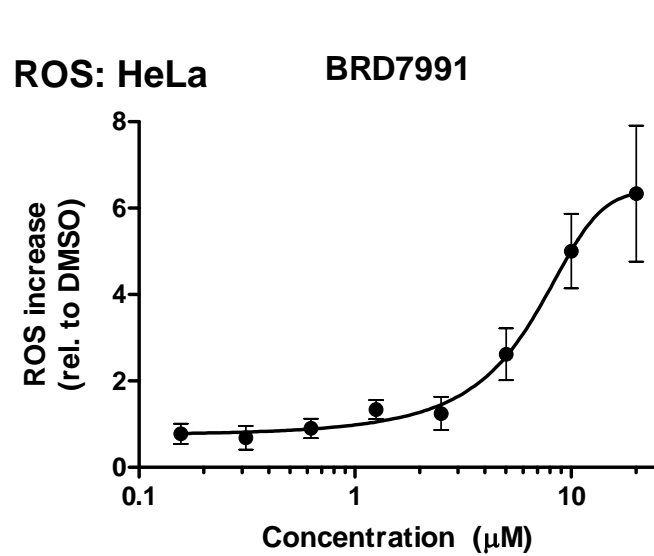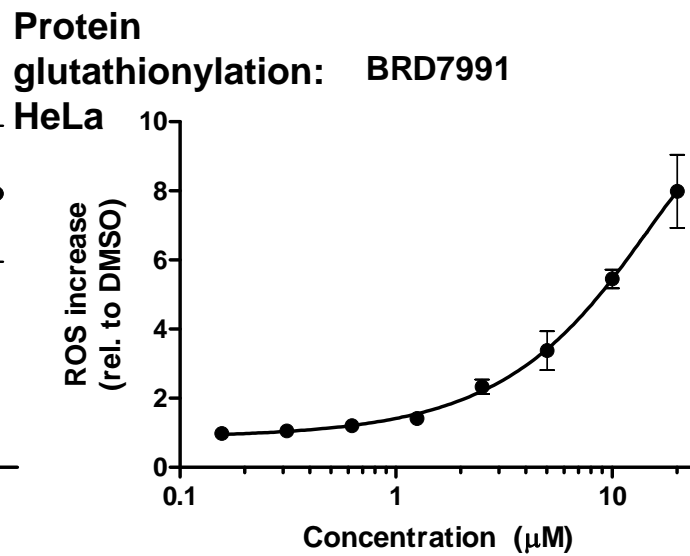

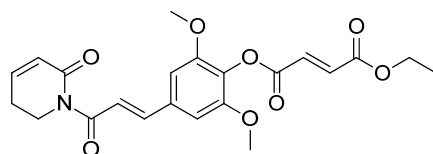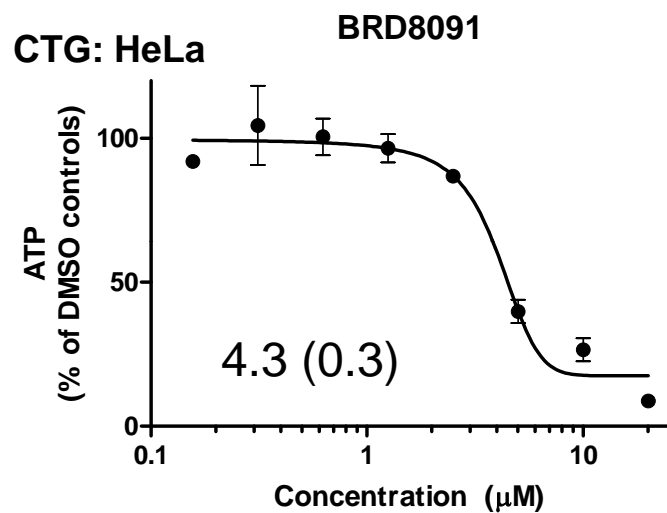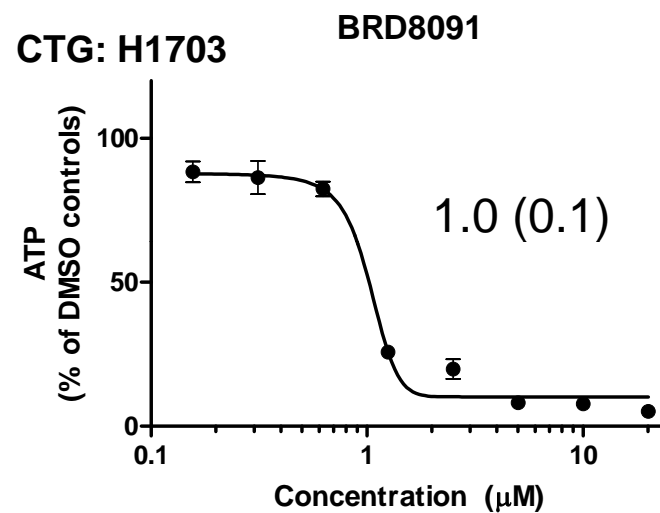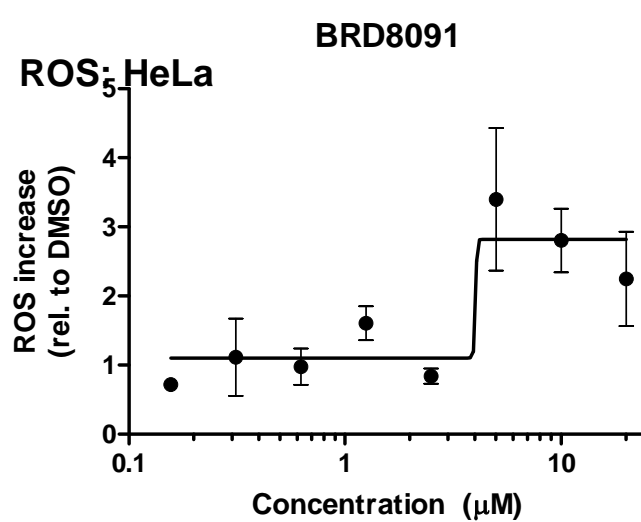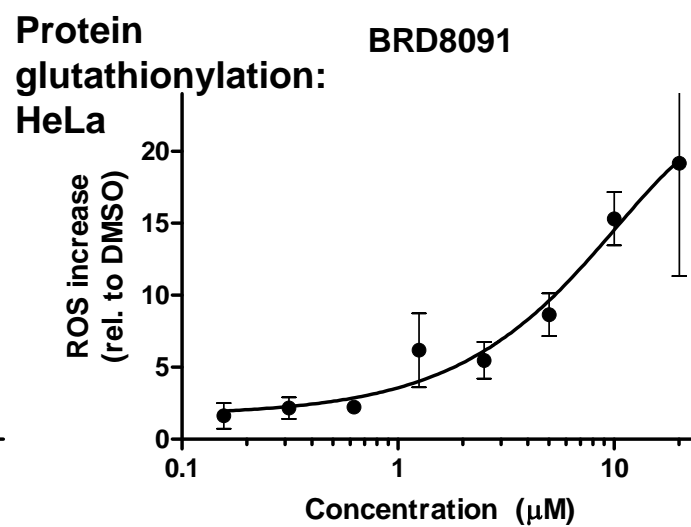

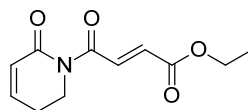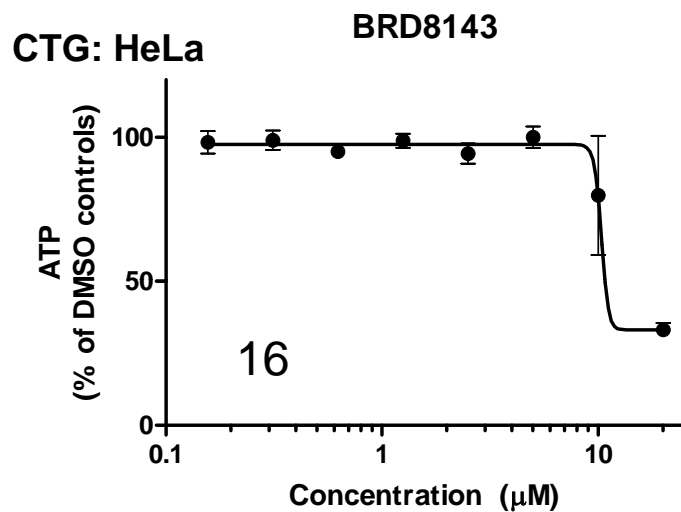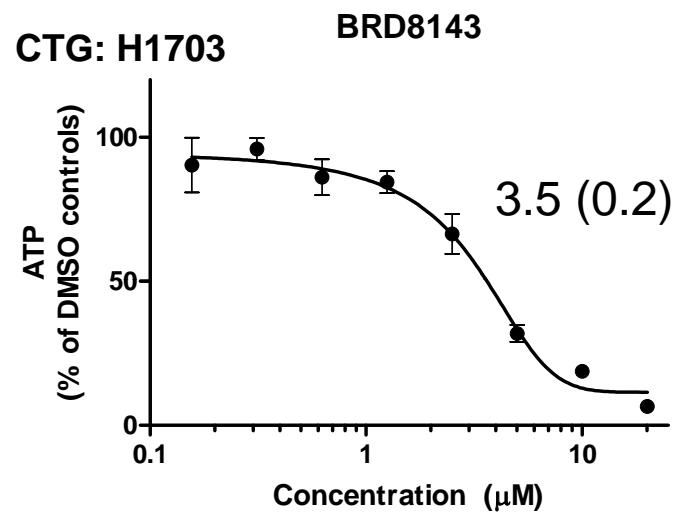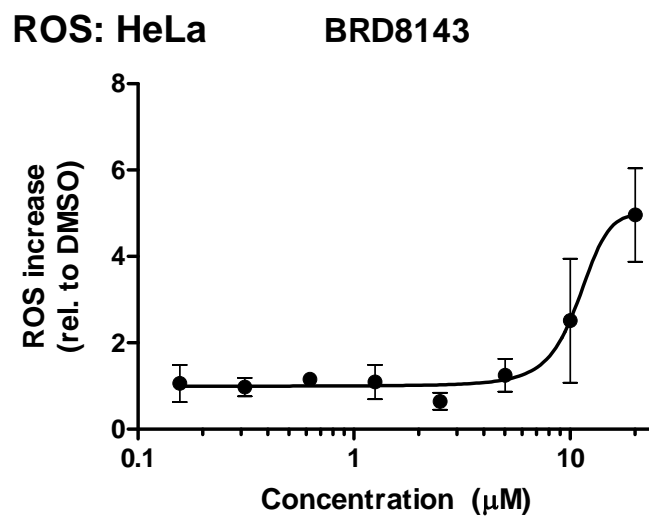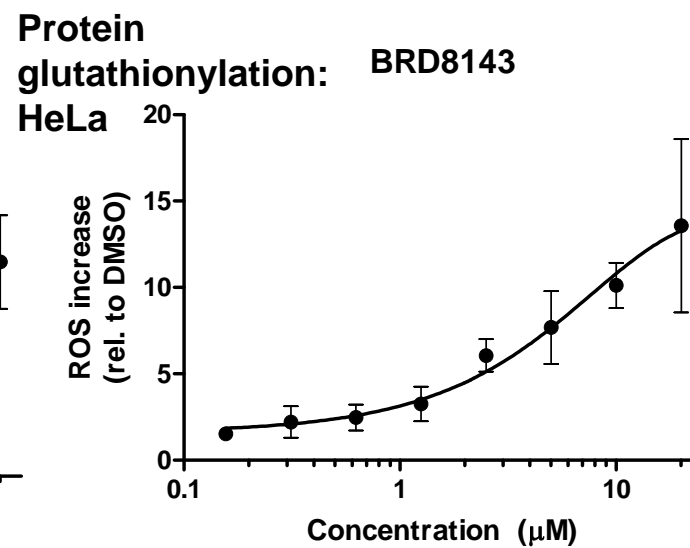

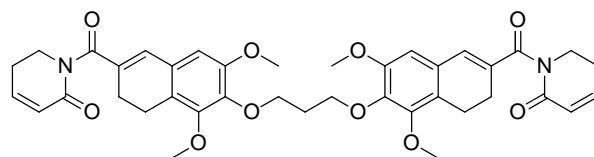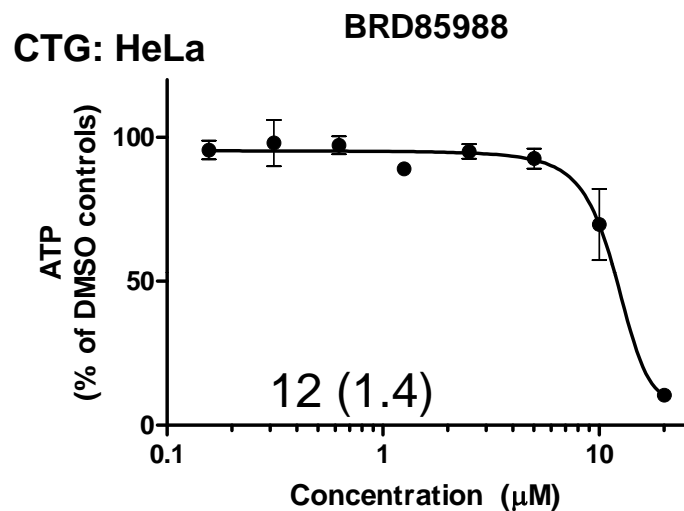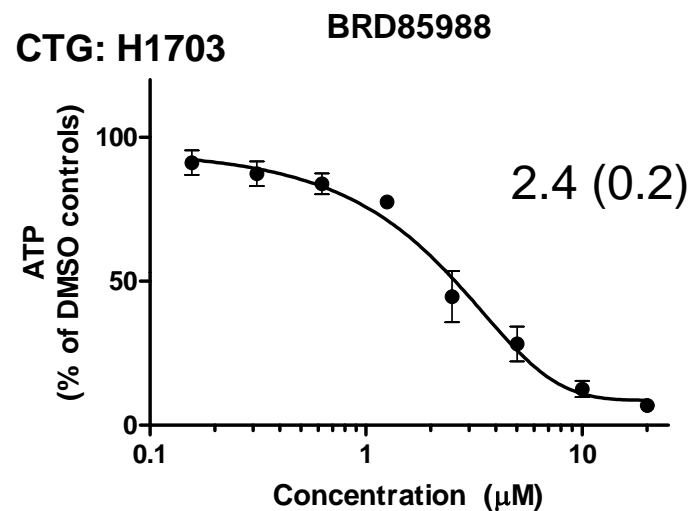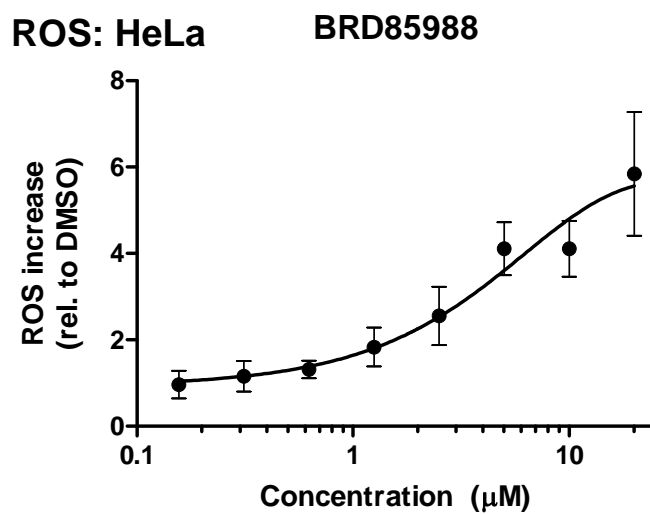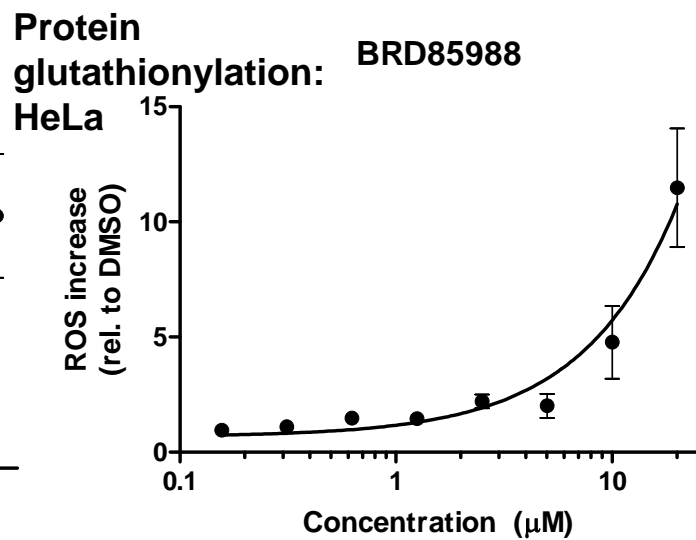

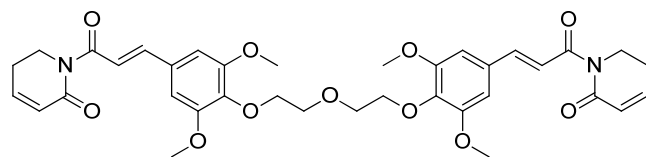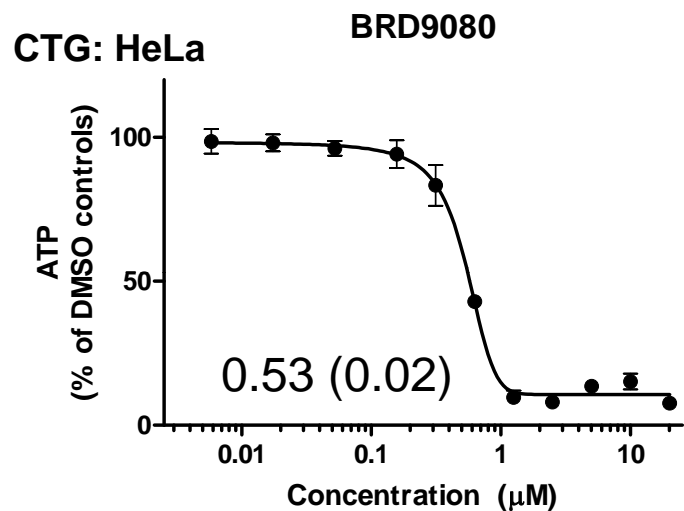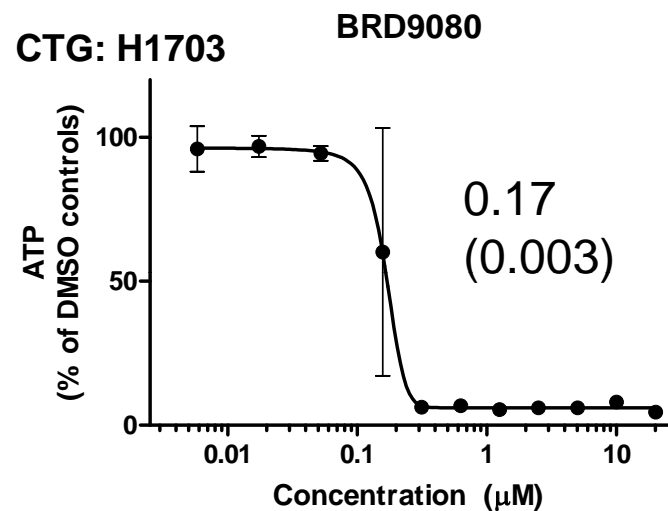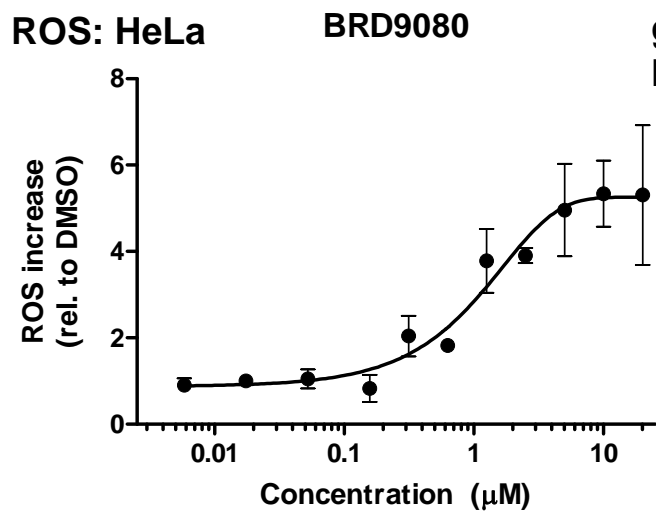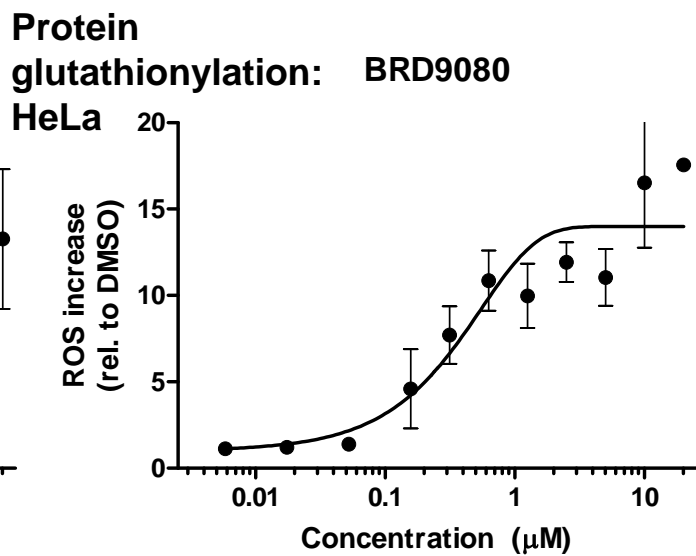



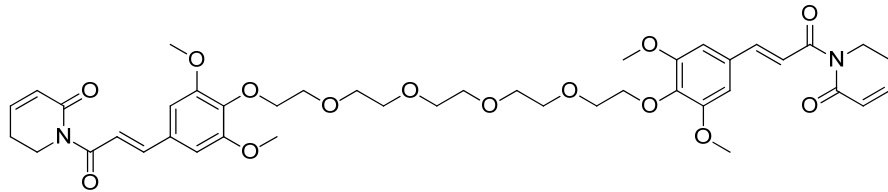

CTG: HeLa

BRD9427

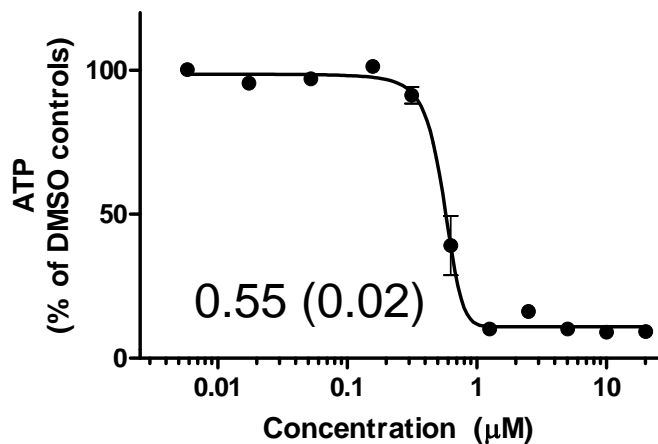

CTG: H1703

BRD9427

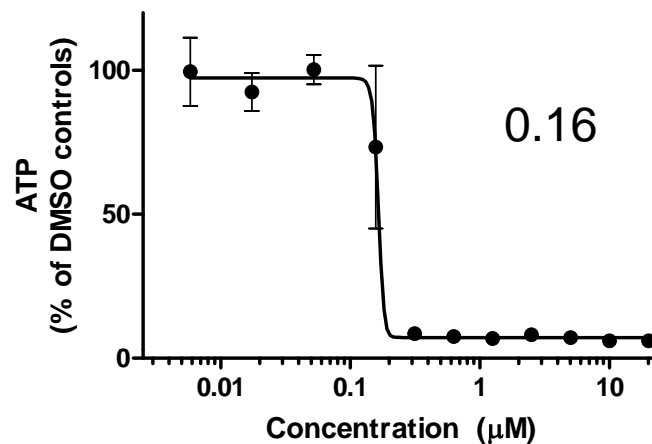

ROS: HeLa

BRD9427

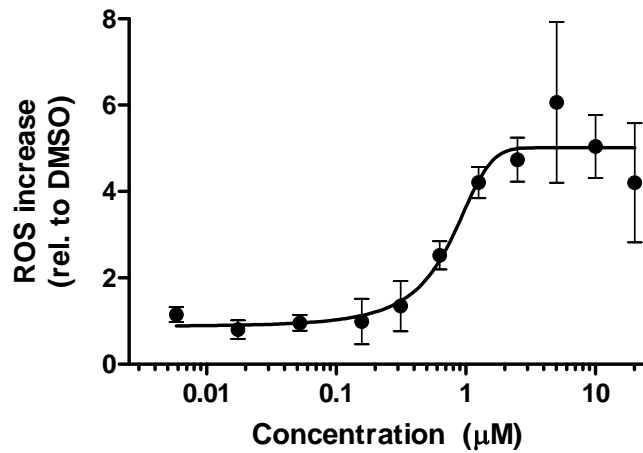

Protein

glutathionylation:

BRD9427

HeLa

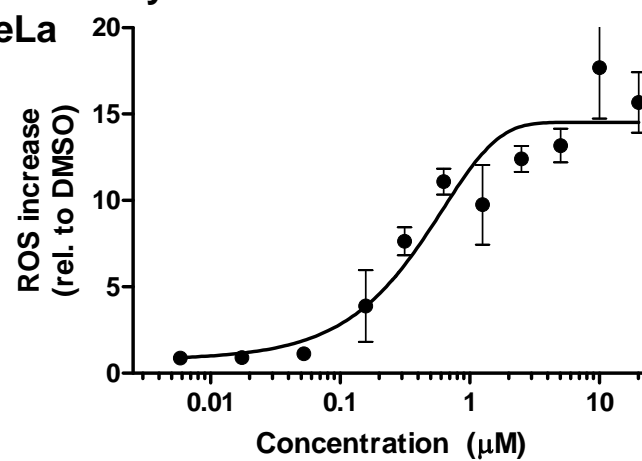

Supplement: NIHMS512243-supplement-01.pdf [file NIHMS512243-supplement-01.pdf]
